# Supplementary material for: Small organic molecules with tailored structures: initiators in the transition-metal-free C–H arylation of unactivated arenes
Source: Royal Society of Chemistry journal article supplement (doi:10.1039/d0ra01845g), 2020-01-01

# Electronic Supplementary Information

## Small Organic Molecules with Tailored Structures: Initiators in Transition-Metal-Free C–H Arylation of Unactivated Arenes

Zhenghui Liu<sup>a,\*</sup>, Peng Wang<sup>b,c</sup>, Yu Chen<sup>d</sup>, Zhenzhong Yan<sup>a</sup>, Suqing Chen<sup>a</sup>,  
Wenjun Chen<sup>e</sup>, Tiancheng Mu<sup>e,\*</sup>

<sup>a</sup> School of Pharmaceutical and Materials Engineering, Taizhou University, Taizhou  
318000, Zhejiang, China

<sup>b</sup> Beijing National Laboratory for Molecular Sciences, CAS Research/Education Center  
for Excellence in Molecular Sciences, Institute of Chemistry, Chinese Academy of  
Sciences, Beijing 100190, China

<sup>c</sup> Key Laboratory of Green Chemical Media and Reactions, Ministry of Education,  
School of Chemistry and Chemical Engineering, Henan Normal University, Xinxiang  
453007, Henan, China

<sup>d</sup> Department of Chemistry and Material Science, Langfang Normal University,  
Langfang 065000, Hebei, China

<sup>e</sup> Department of Chemistry, Renmin University of China, Beijing 100872, China

\* Corresponding author.

## Table of Contents

|    |                                              |        |
|----|----------------------------------------------|--------|
| 1. | Result of kinetic isotope experiment         | S3     |
| 2. | FT-IR spectra of pure SOM and SOM with tBuOK | S4     |
| 3. | Information for GC analysis                  | S5     |
| 4. | NMR spectra of products                      | S6-S39 |

# 1. Result of kinetic isotope experiment

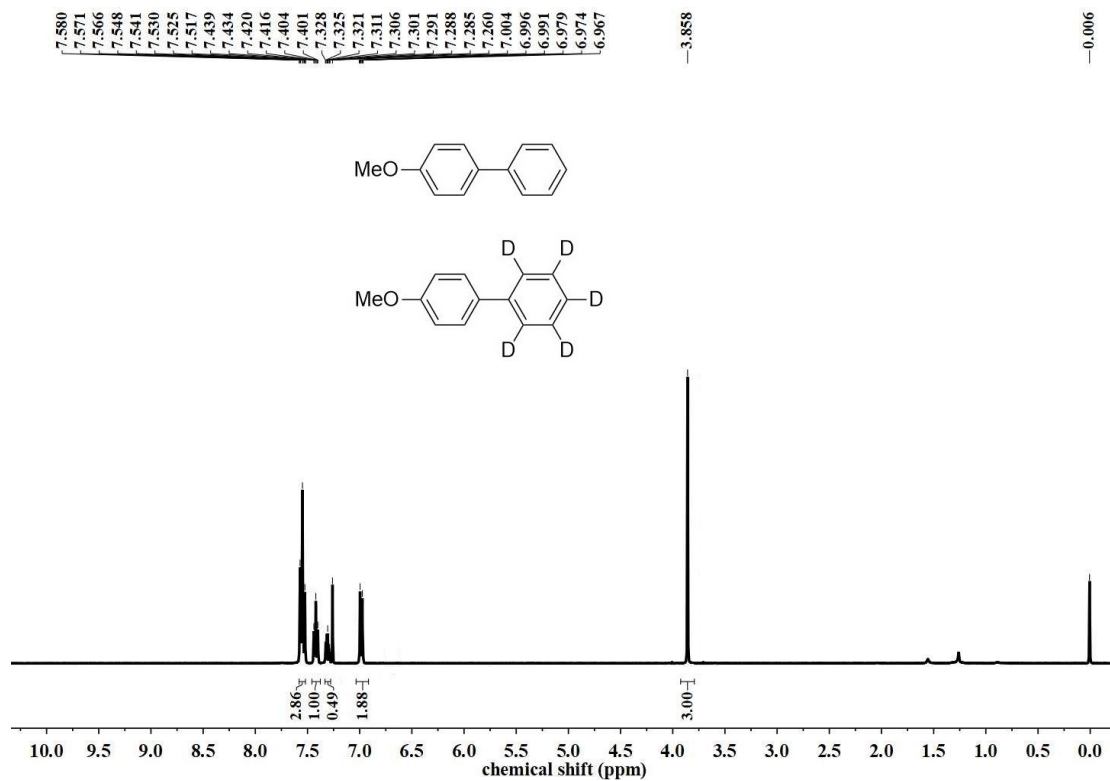

Figure S1 NMR spectrum of kinetic isotope experiment

## 2. FT-IR spectra of pure SOM and SOM with tBuOK

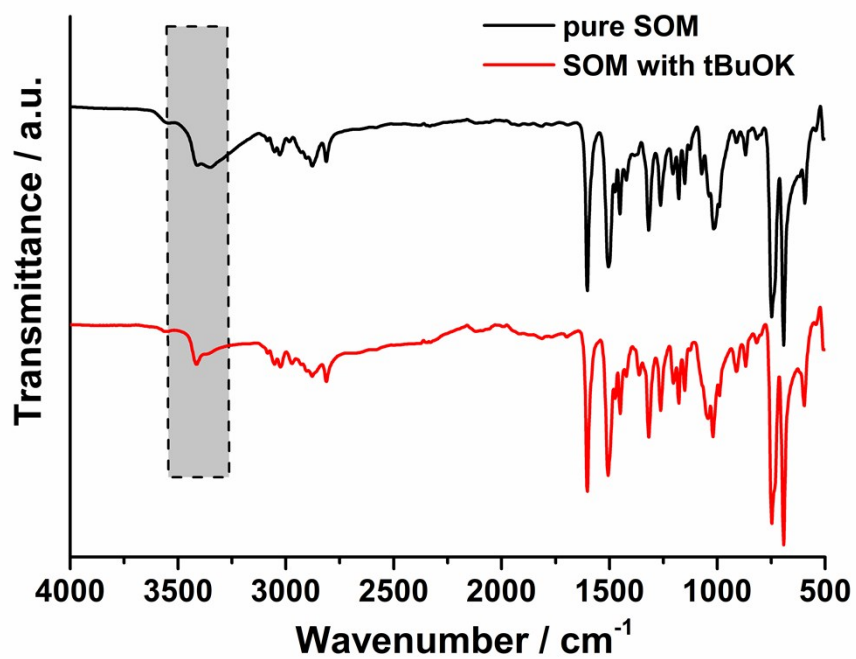

**Figure S2** FT-IR spectra of pure SOM and SOM with tBuOK

### 3. Information for GC analysis

The yields of the product biphenyl of each reaction were determined by GC using dodecane as the internal standard and calculated through the calibration curves as shown below.

#### Calibration Curve

| Standard Solution | iodobenzene/g | dodecane/g |
|-------------------|---------------|------------|
| 1                 | 0.0624        | 0.0488     |
| 2                 | 0.1289        | 0.0502     |
| 3                 | 0.2231        | 0.0491     |
| 4                 | 0.3471        | 0.0509     |
| 5                 | 0.4696        | 0.0502     |

| Standard Solution | biphenyl/g | dodecane/g |
|-------------------|------------|------------|
| 1                 | 0.0100     | 0.0745     |
| 2                 | 0.0213     | 0.0796     |
| 3                 | 0.0266     | 0.0710     |
| 4                 | 0.0313     | 0.1077     |
| 5                 | 0.0466     | 0.0793     |

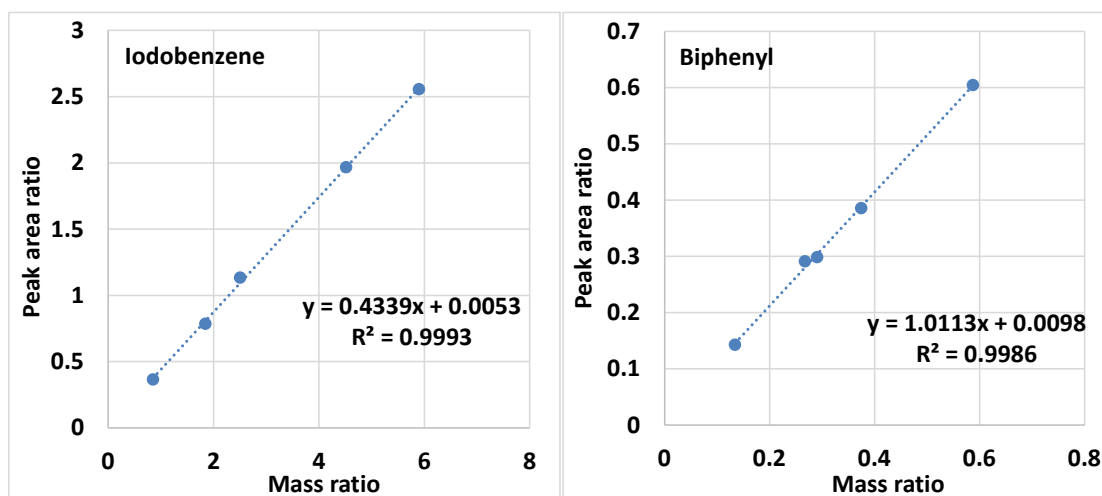

#### GC spectra

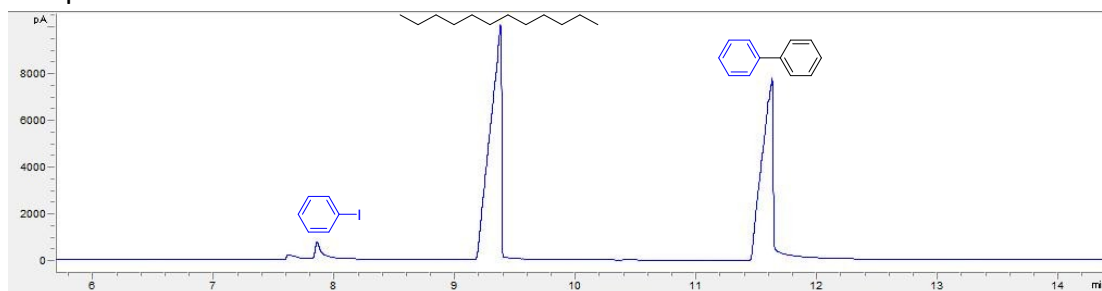

#### 4. NMR spectra of products

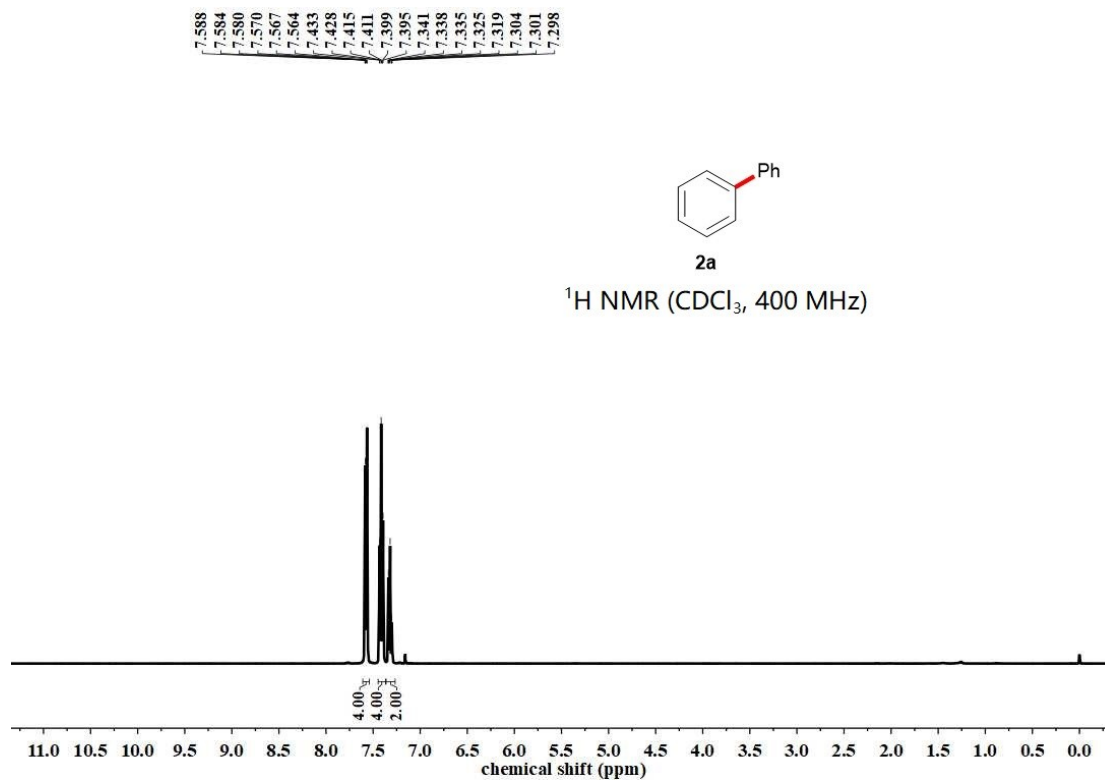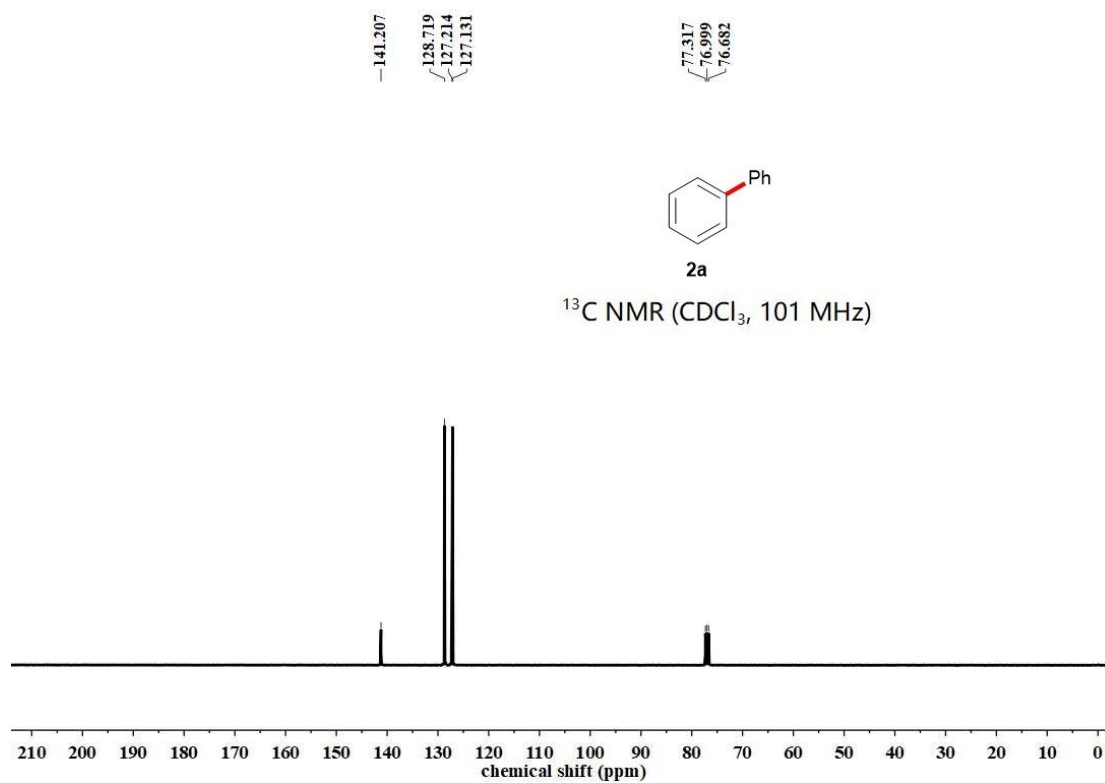

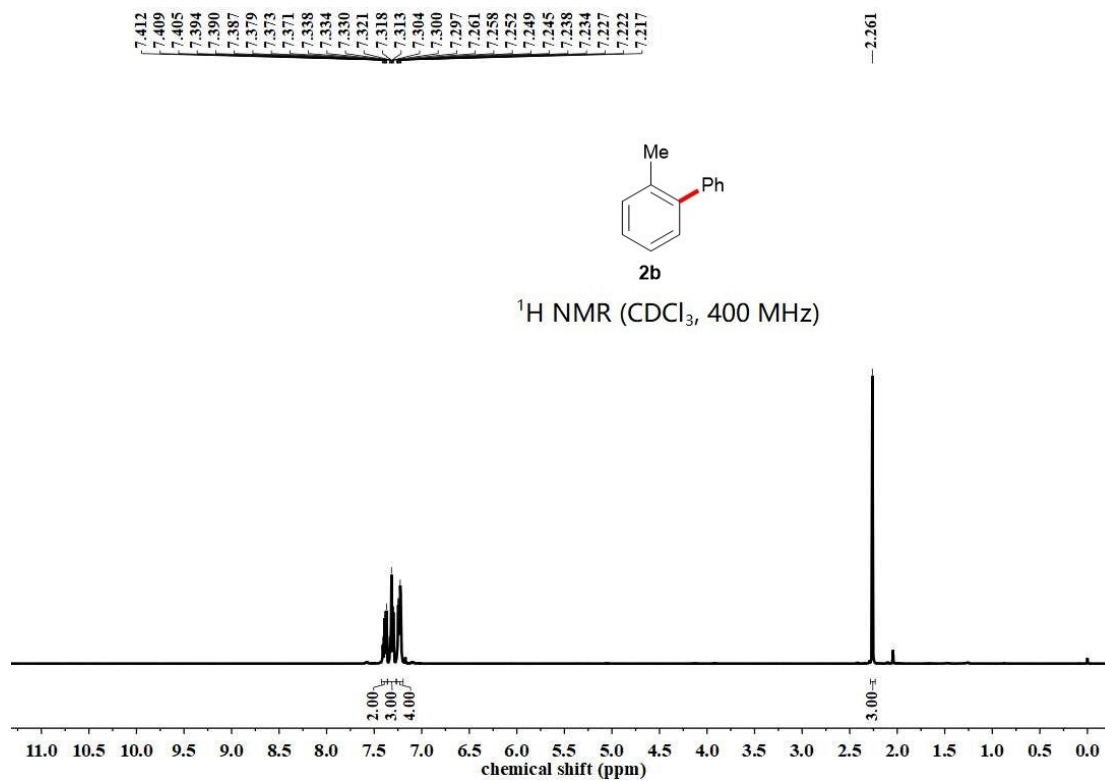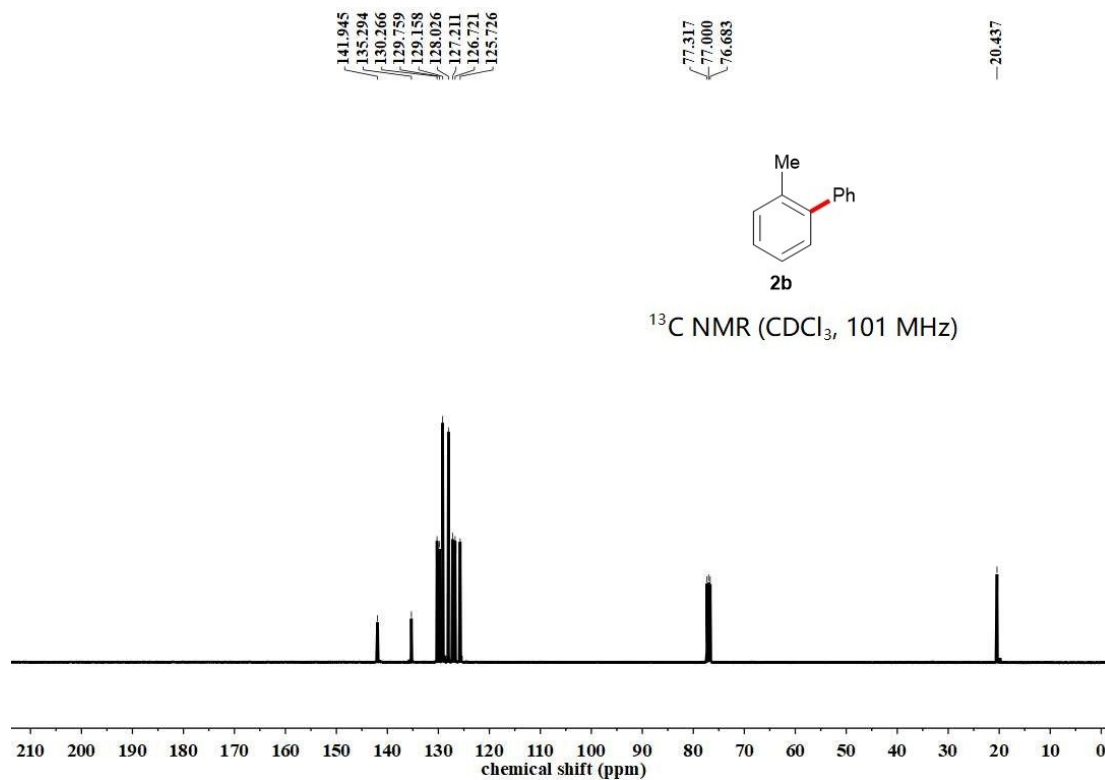

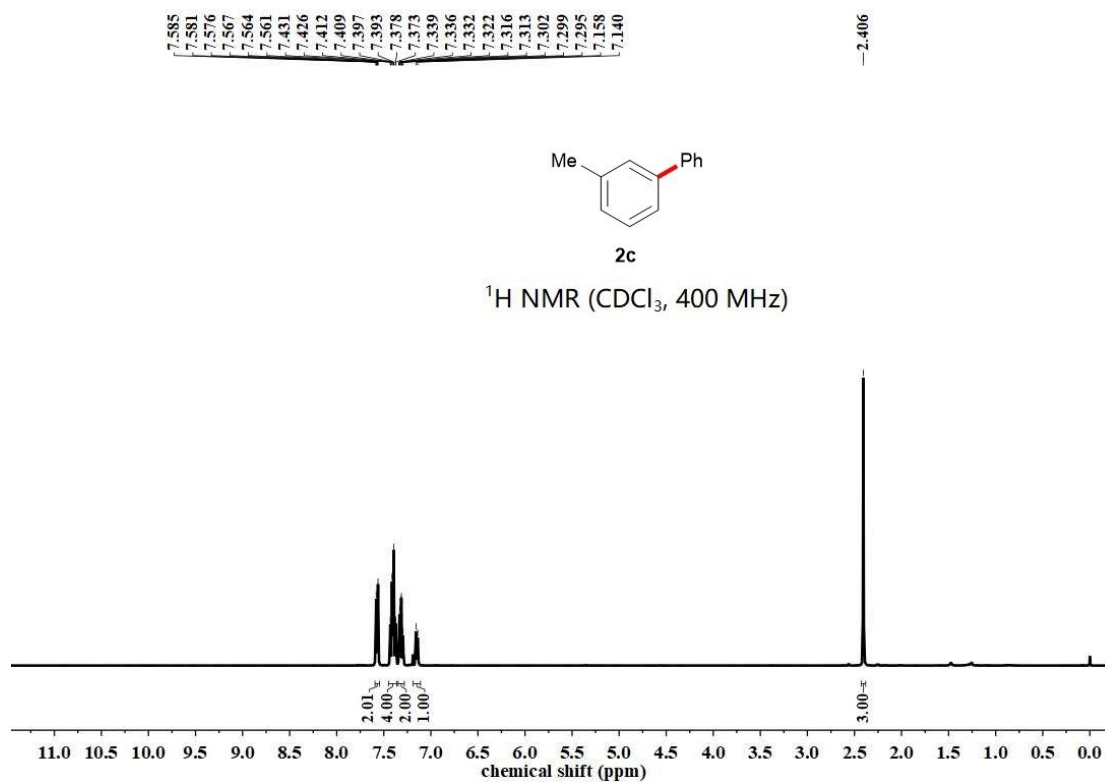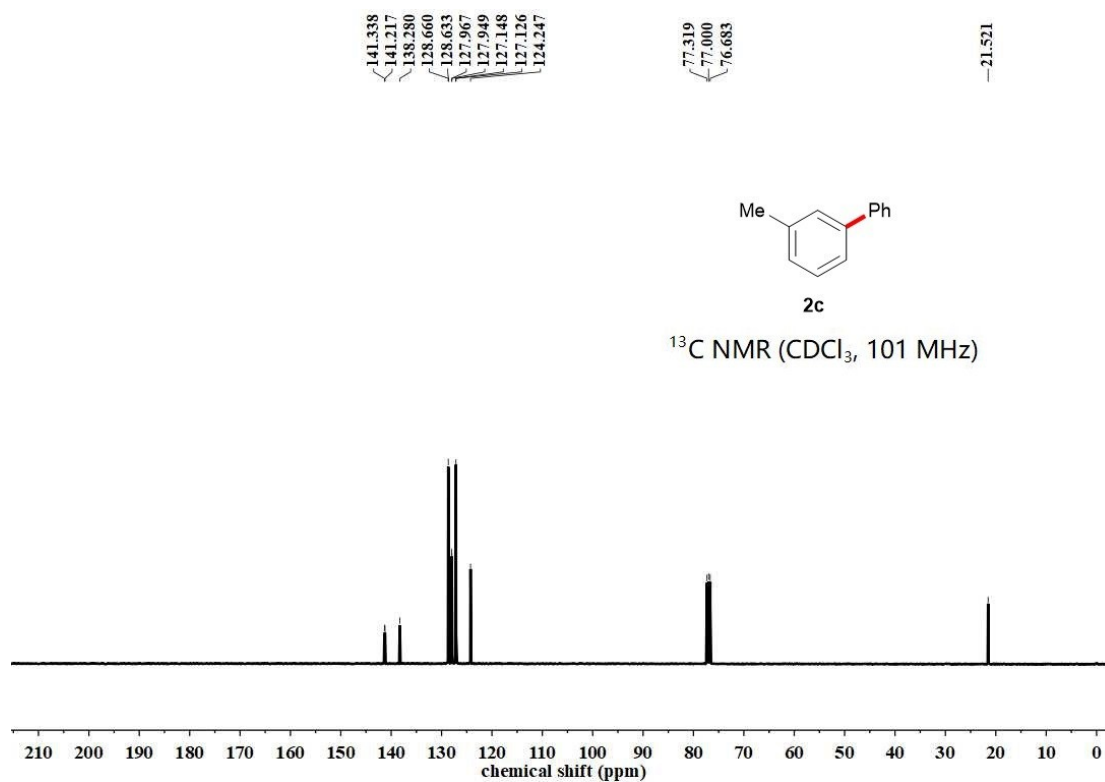



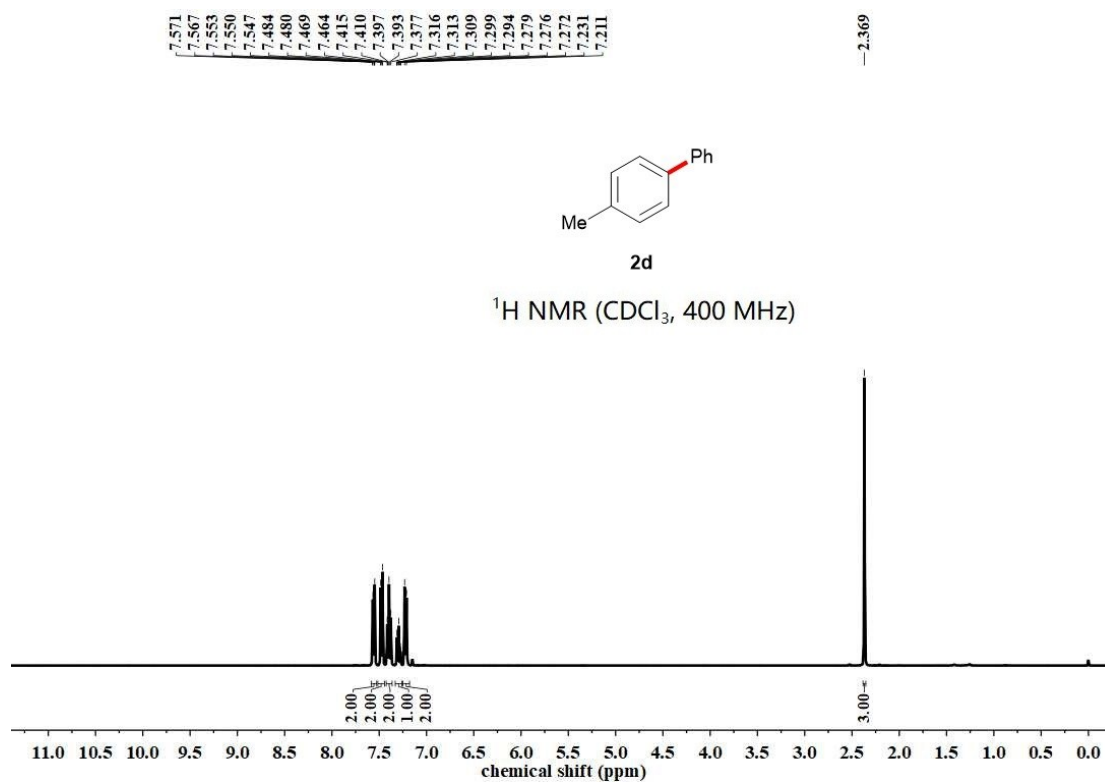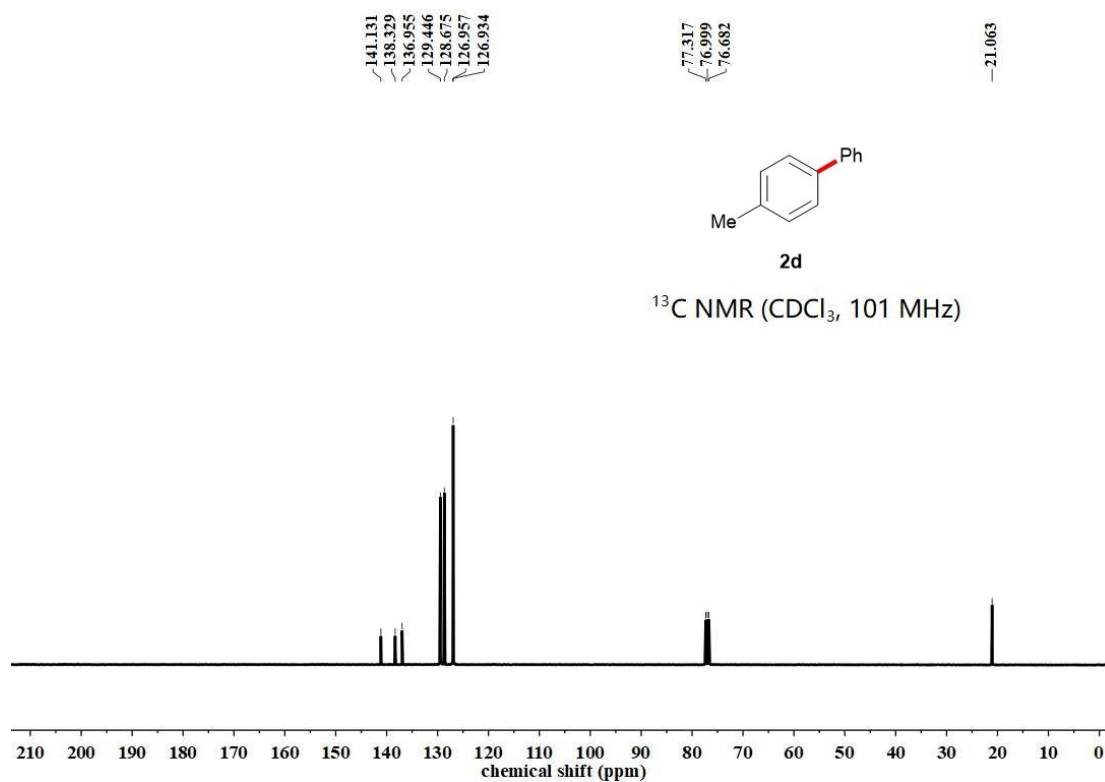

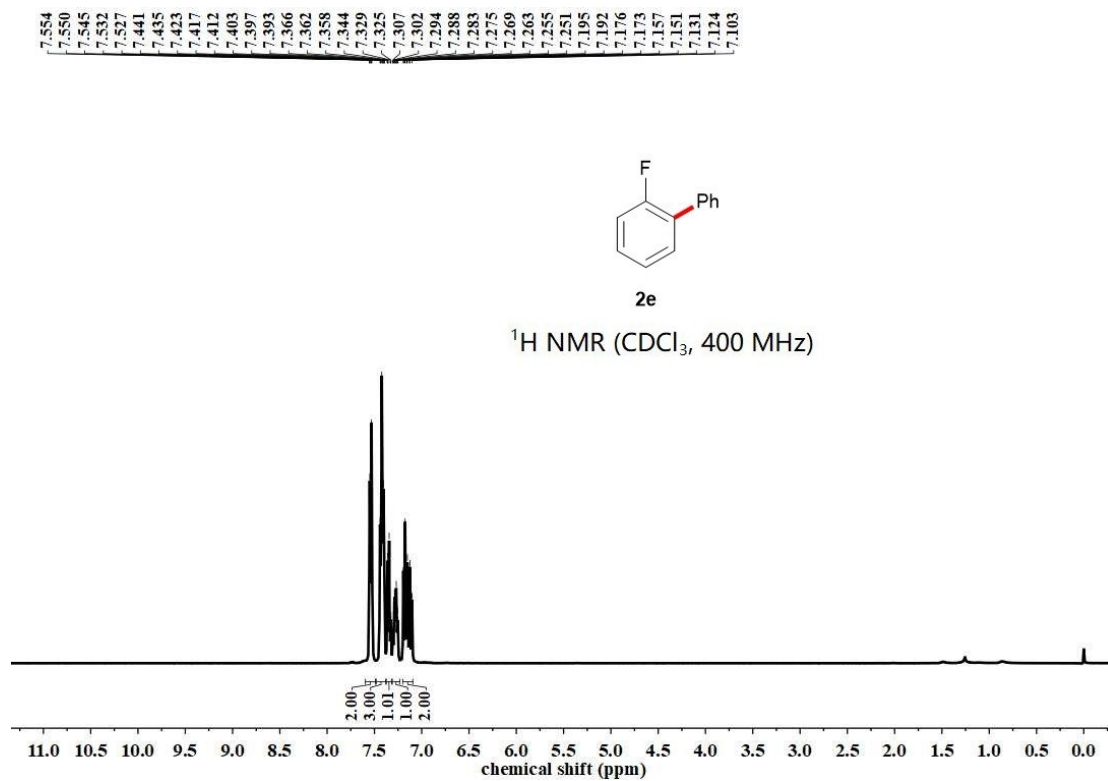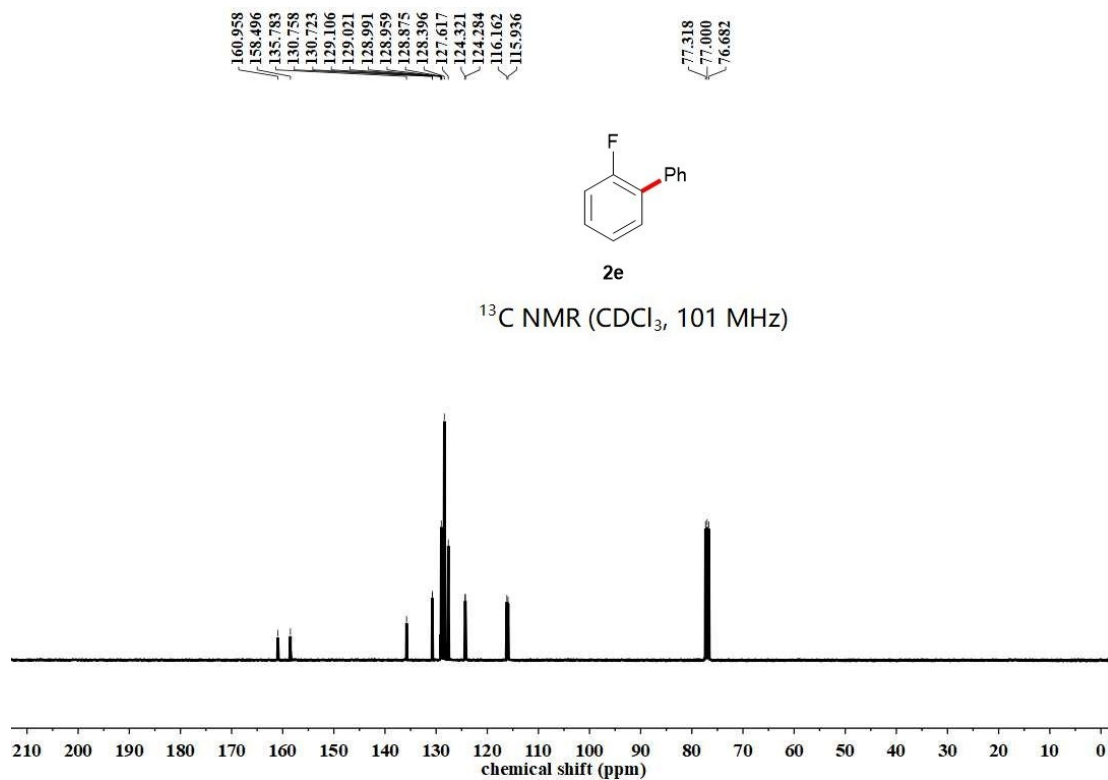

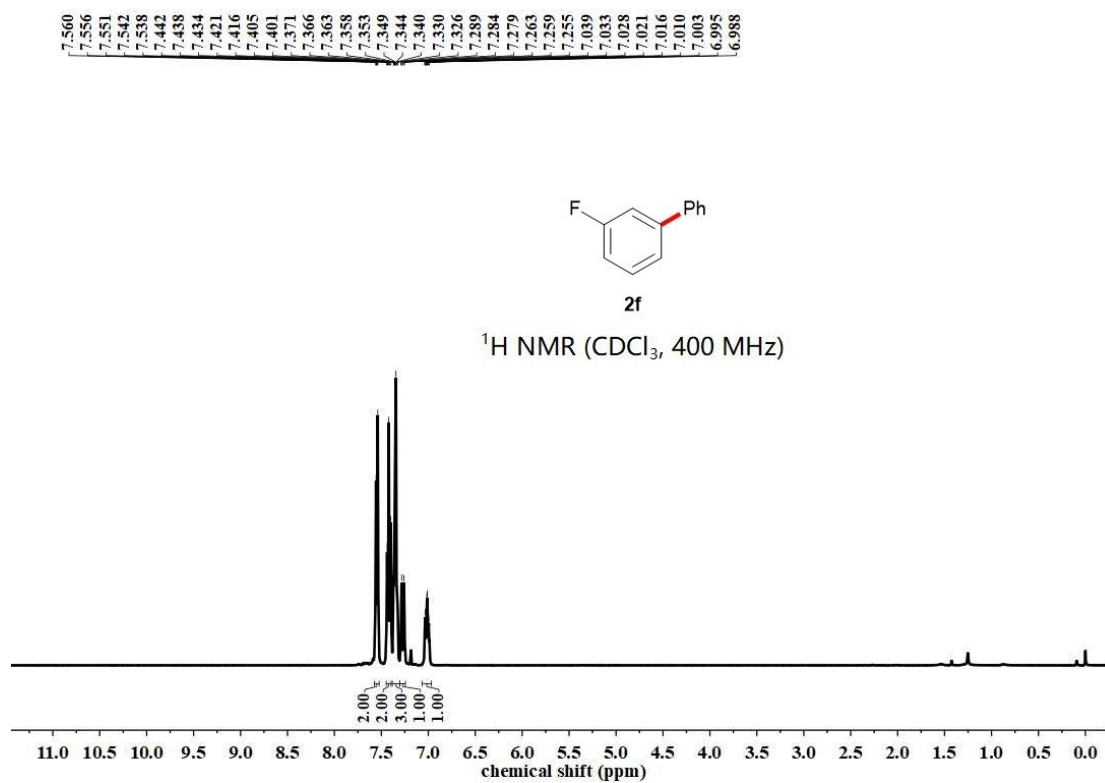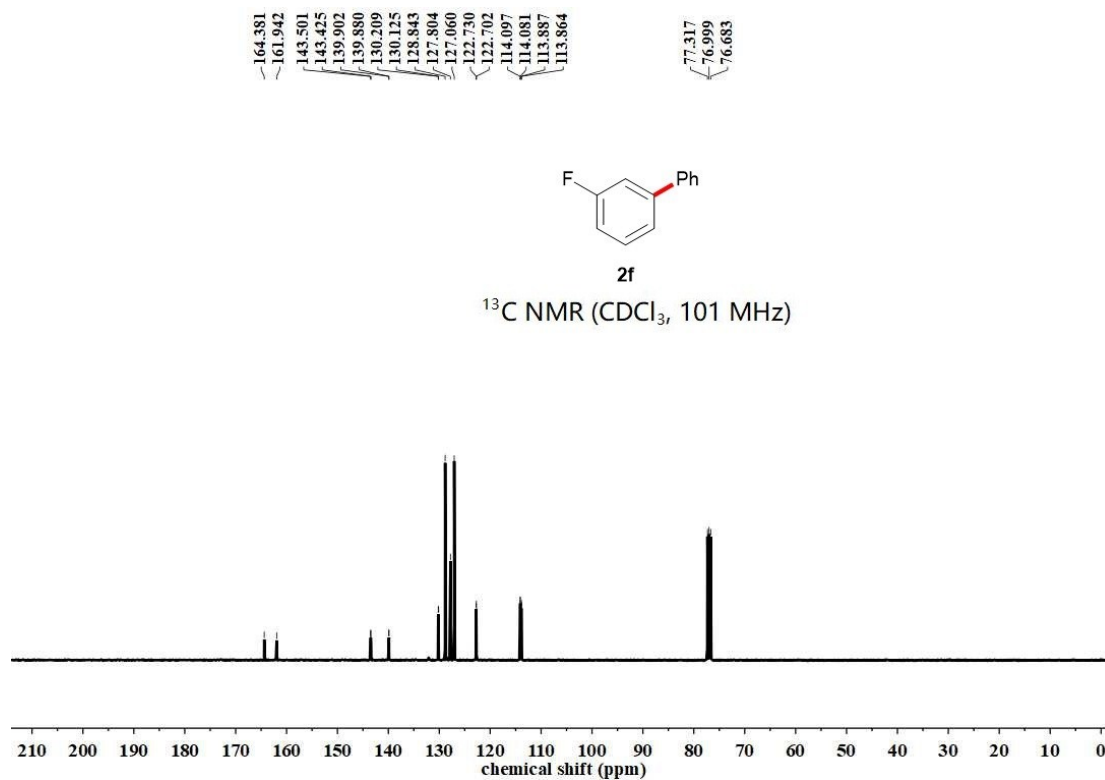

7.542  
7.537  
7.526  
7.519  
7.443  
7.424  
7.405  
7.353  
7.334  
7.316  
7.115  
7.114  
7.093

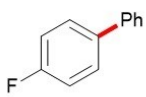

2g

$^1\text{H NMR}$  ( $\text{CDCl}_3$ , 400 MHz)

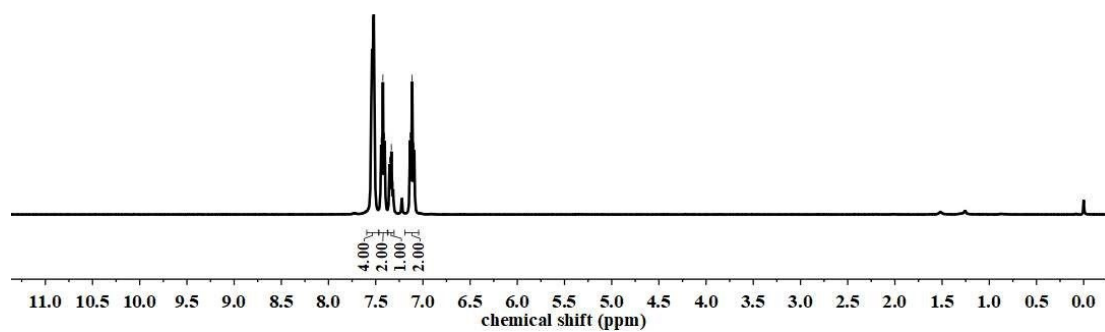

163.658  
161.212  
140.225  
137.323  
137.291  
128.793  
128.696  
128.616  
127.231  
126.993  
115.689  
115.476  
77.318  
77.001  
76.683

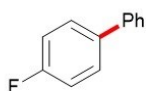

2g

$^{13}\text{C NMR}$  ( $\text{CDCl}_3$ , 101 MHz)

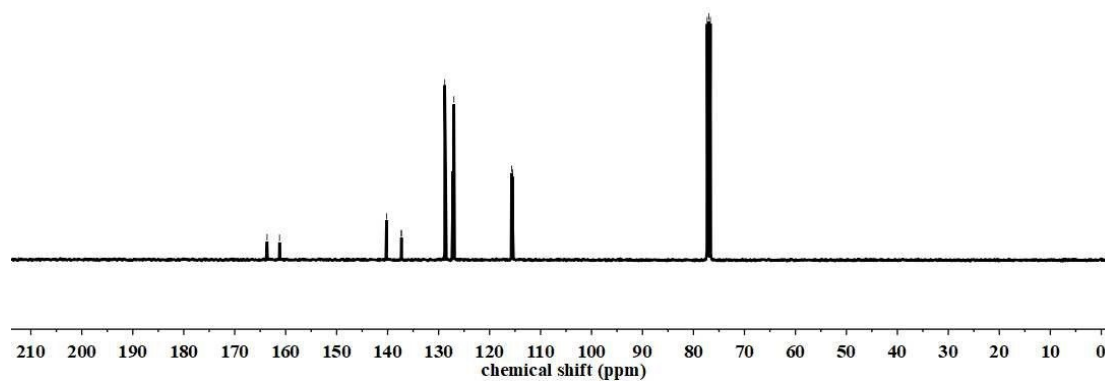

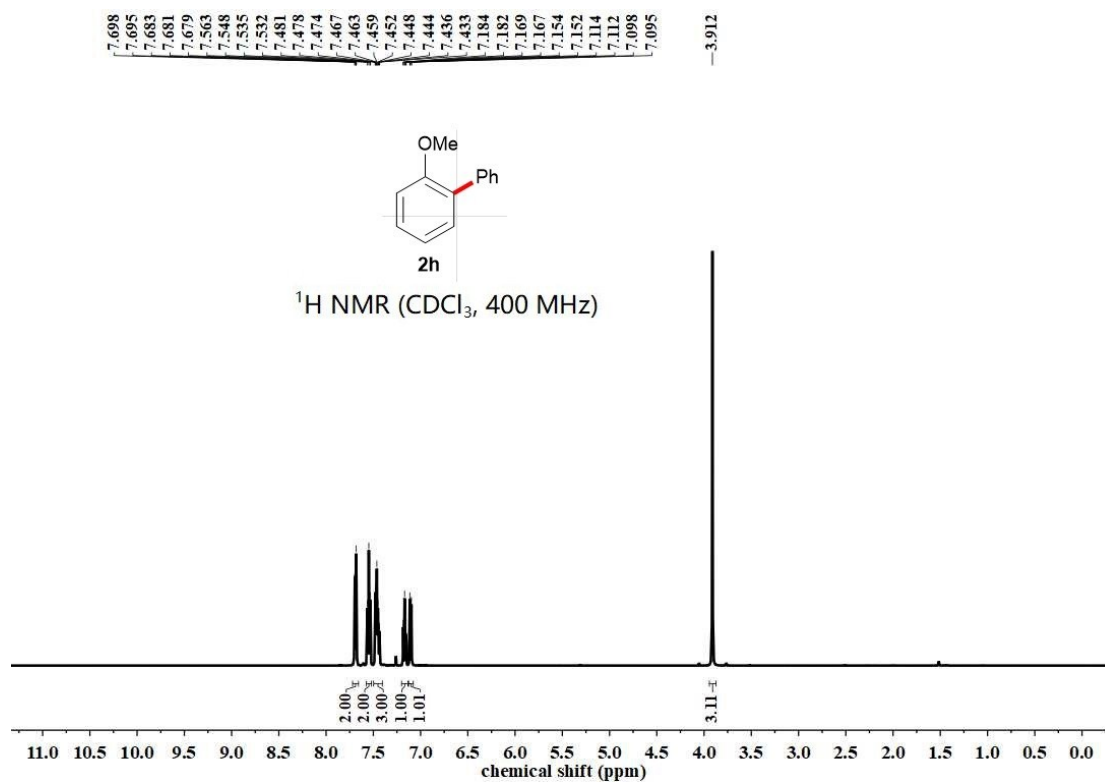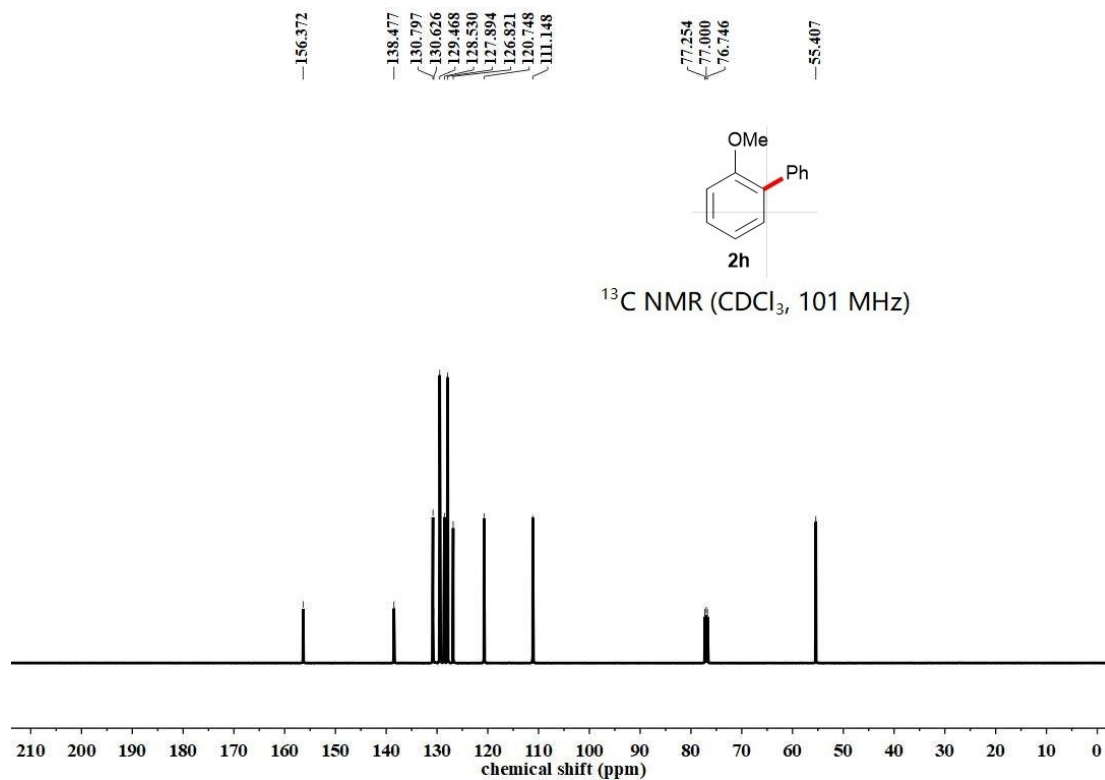

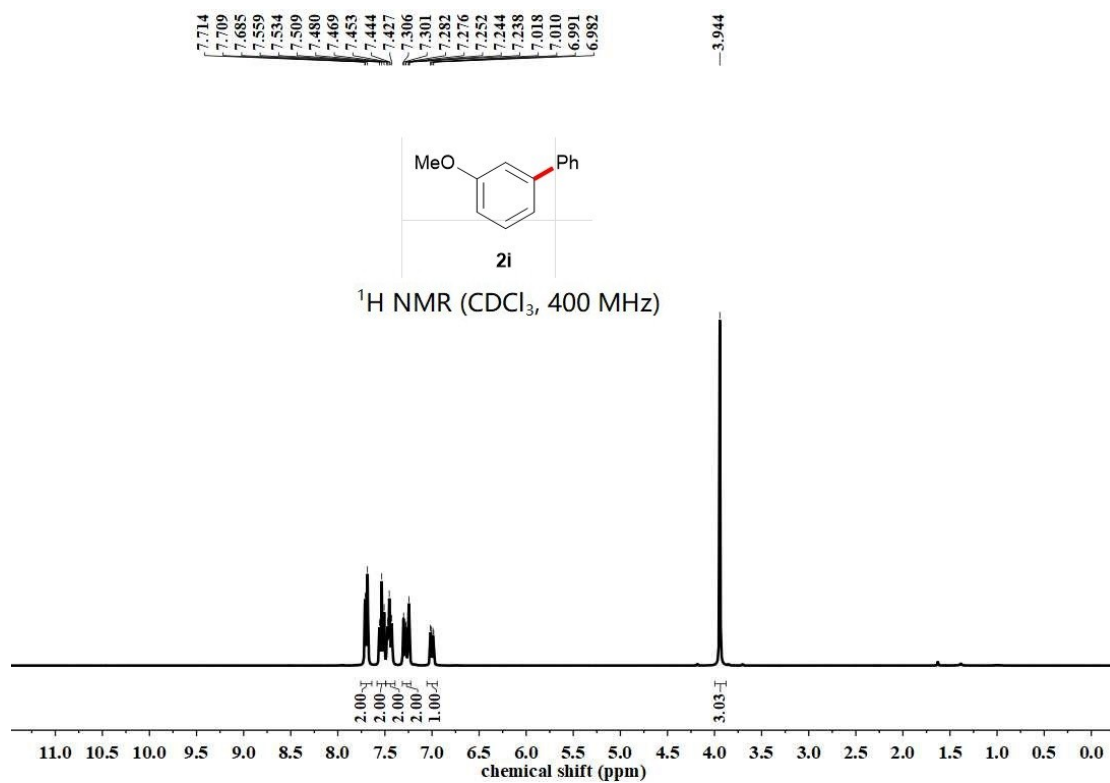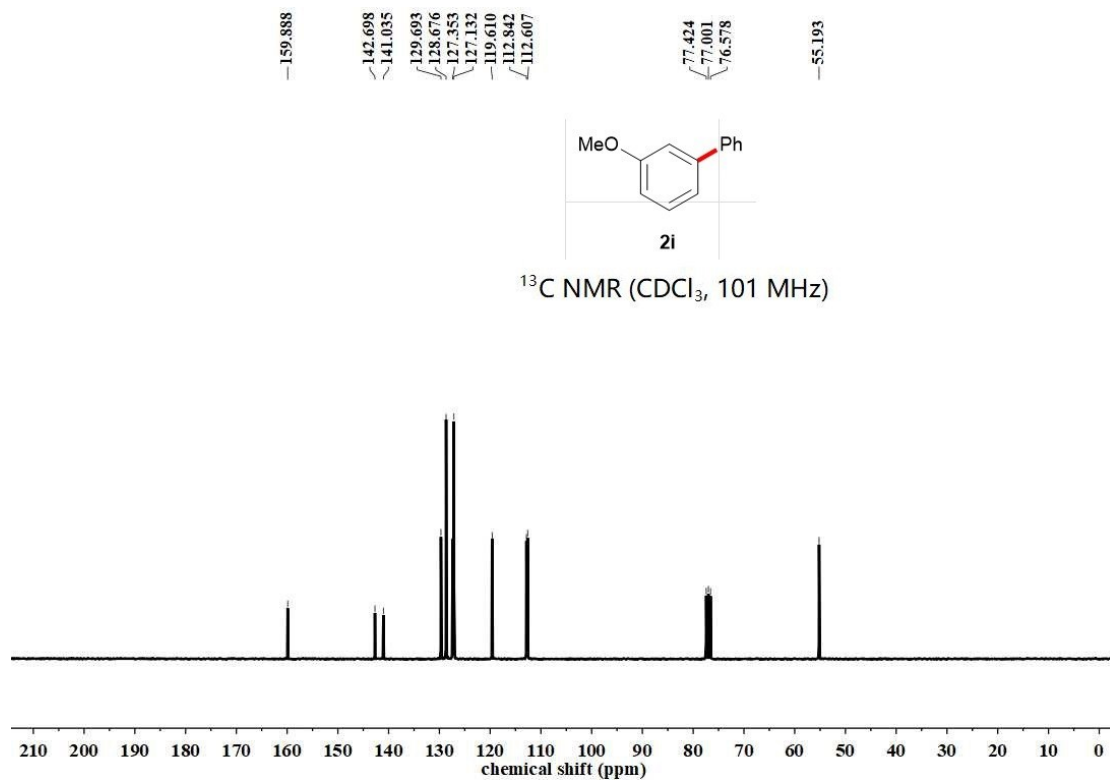

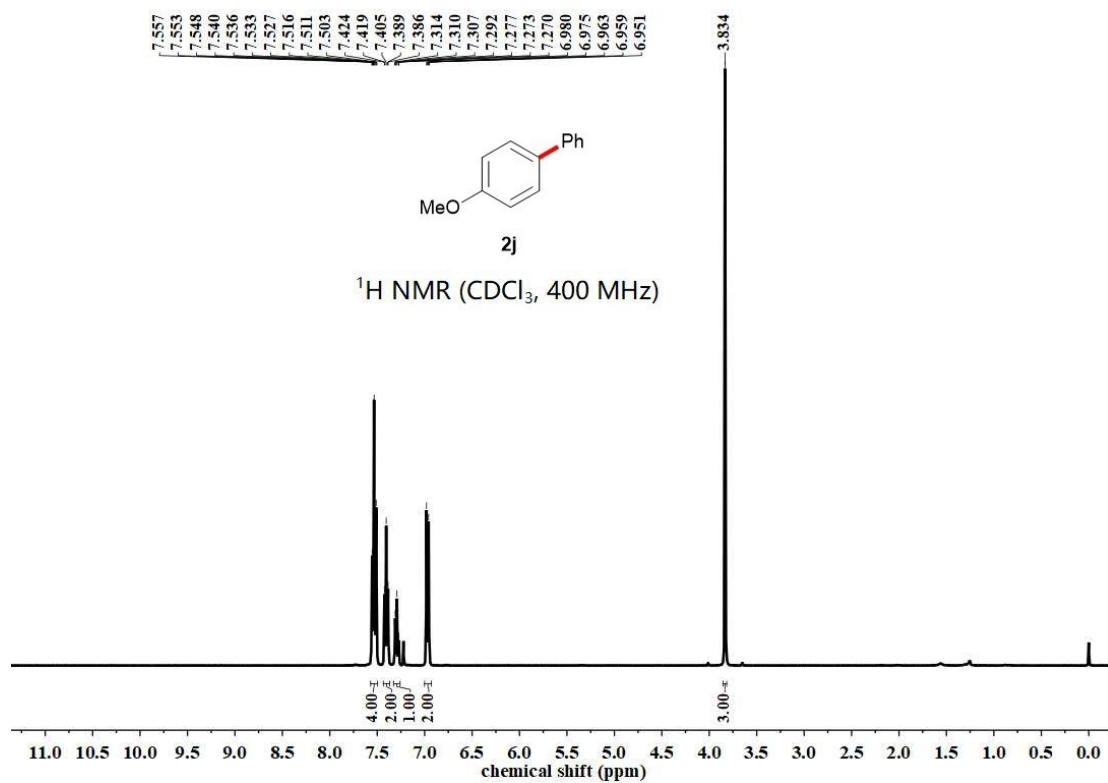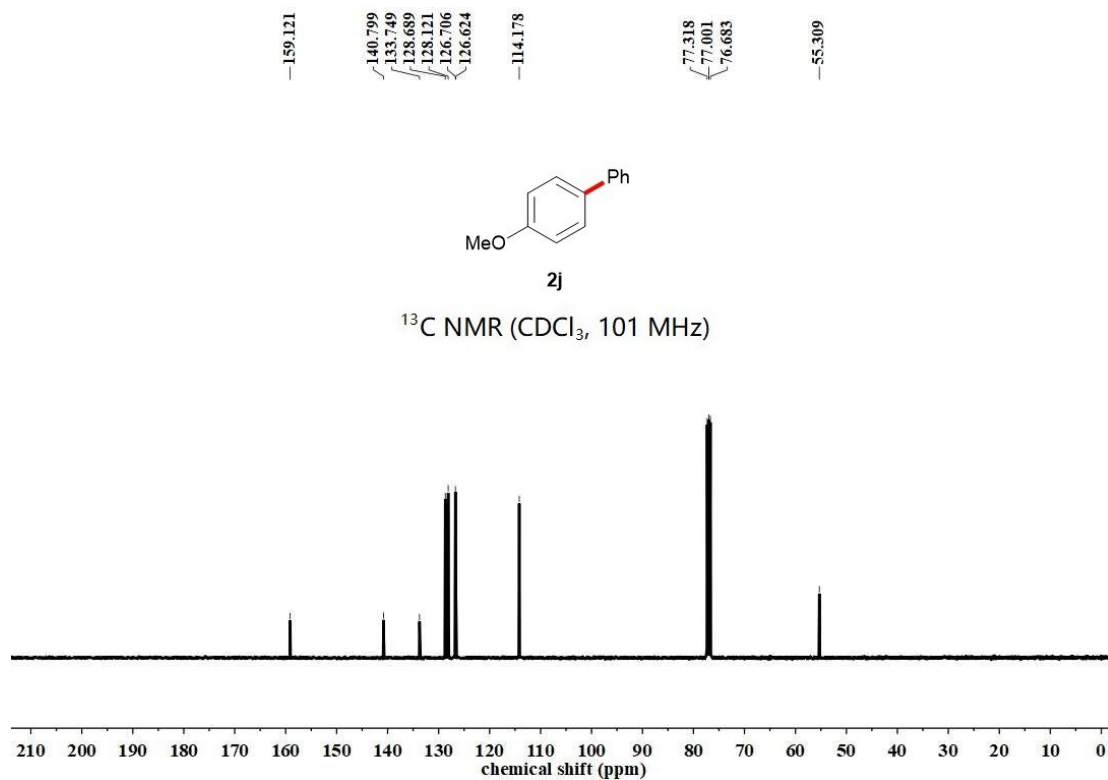

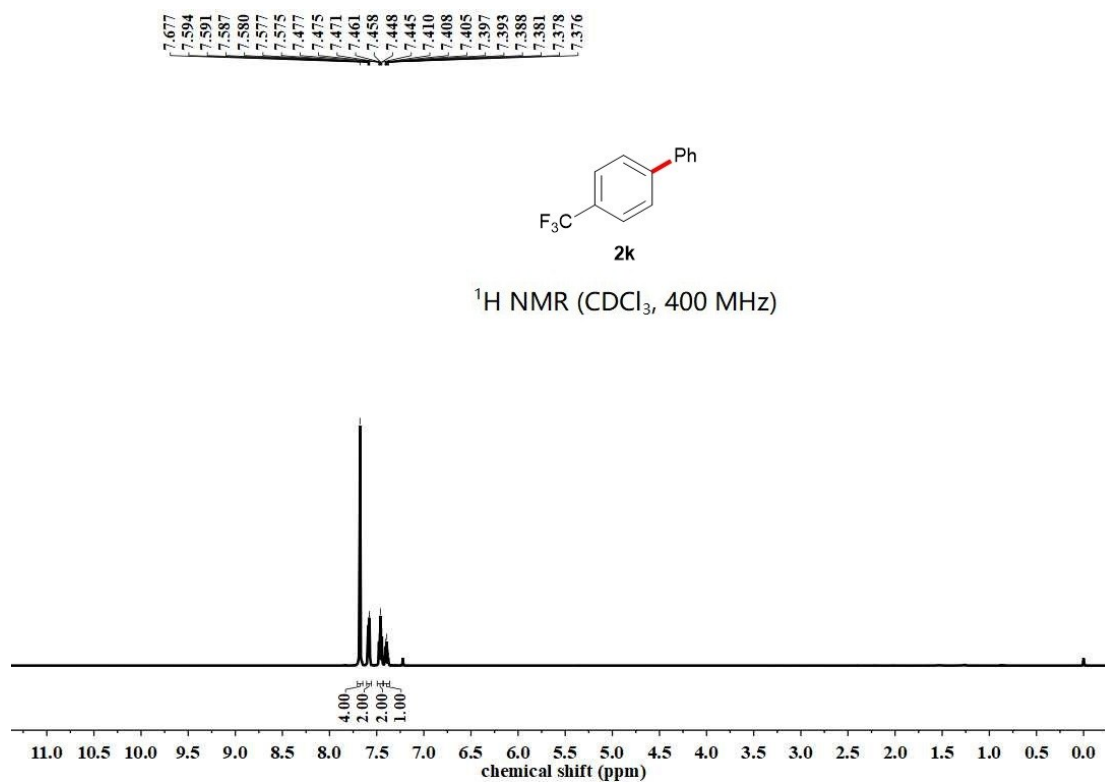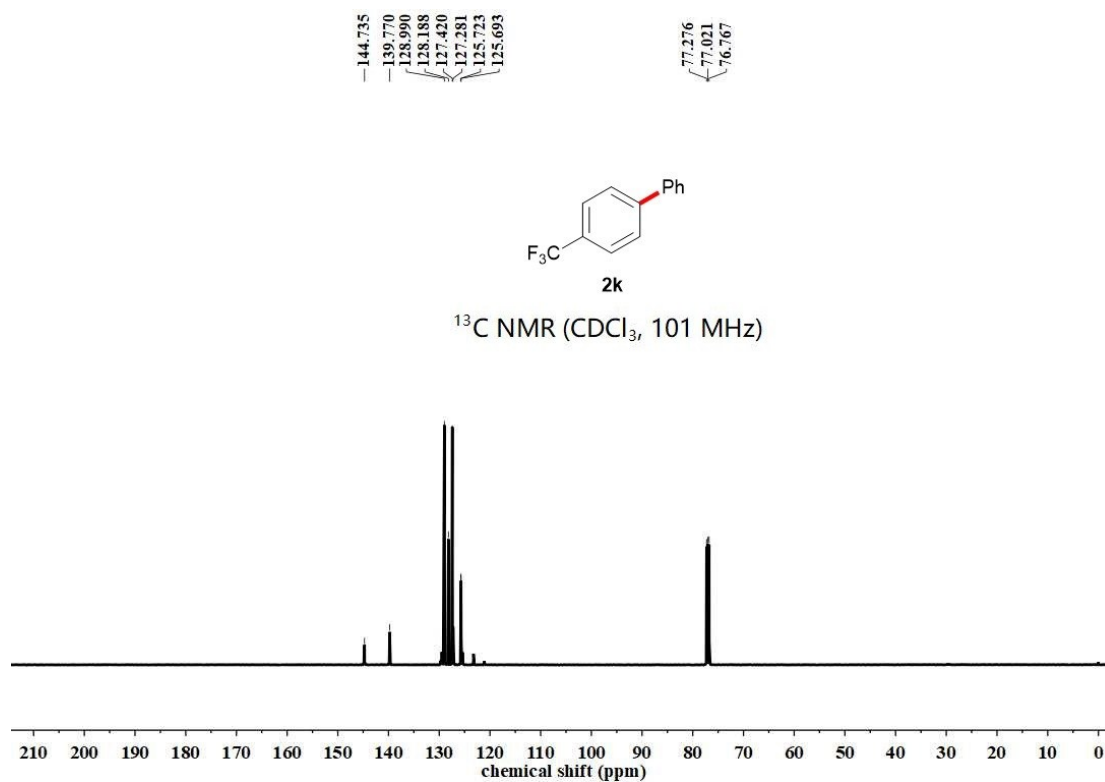



7.881  
7.878  
7.875  
7.865  
7.863  
7.859  
7.757  
7.753  
7.751  
7.741  
7.738  
7.735  
7.601  
7.598  
7.595  
7.592  
7.586  
7.583  
7.580  
7.576  
7.472  
7.469  
7.468  
7.465  
7.457  
7.456  
7.454  
7.453  
7.451  
7.441  
7.439  
7.438  
7.435  
7.375  
7.369  
7.362  
7.359  
7.357  
7.356  
7.353  
7.346  
7.343  
7.339

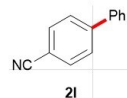

$^1\text{H NMR}$  ( $\text{CDCl}_3$ , 400 MHz)

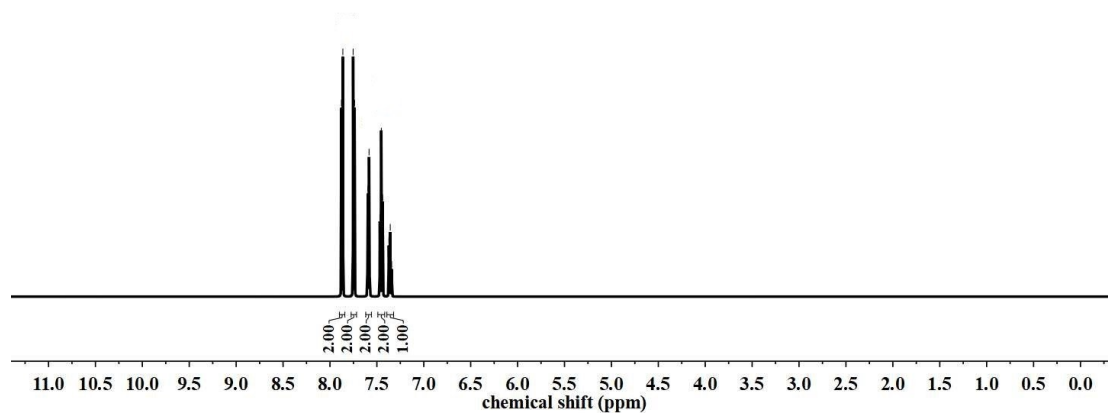

140.945  
140.617  
132.581  
128.852  
127.741  
127.663  
127.144  
118.490  
110.314  
77.318  
77.001  
76.681

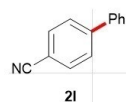

$^{13}\text{C NMR}$  ( $\text{CDCl}_3$ , 101 MHz)

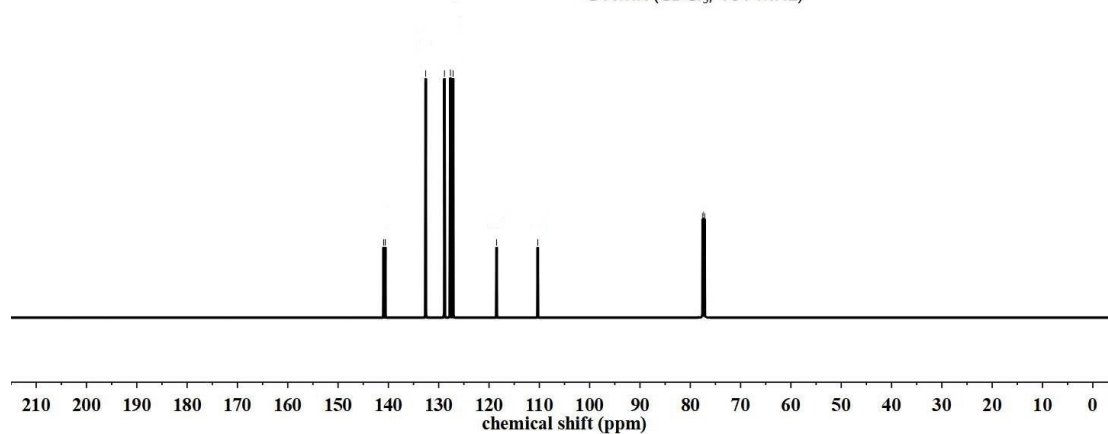

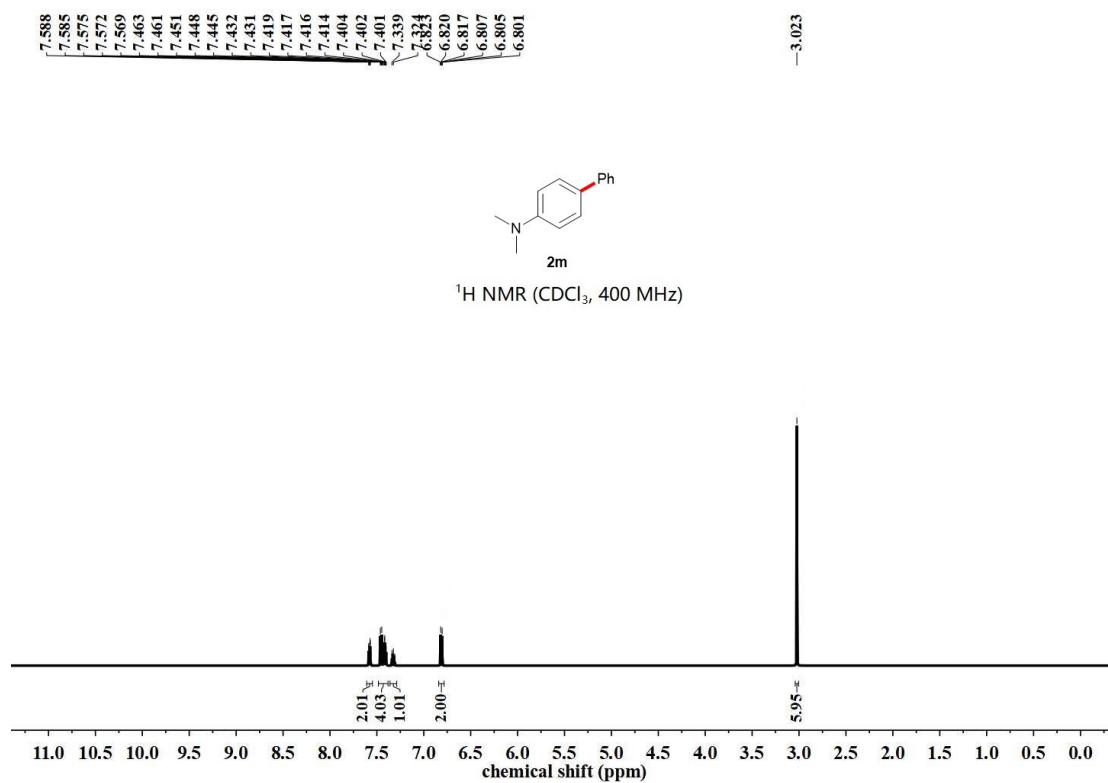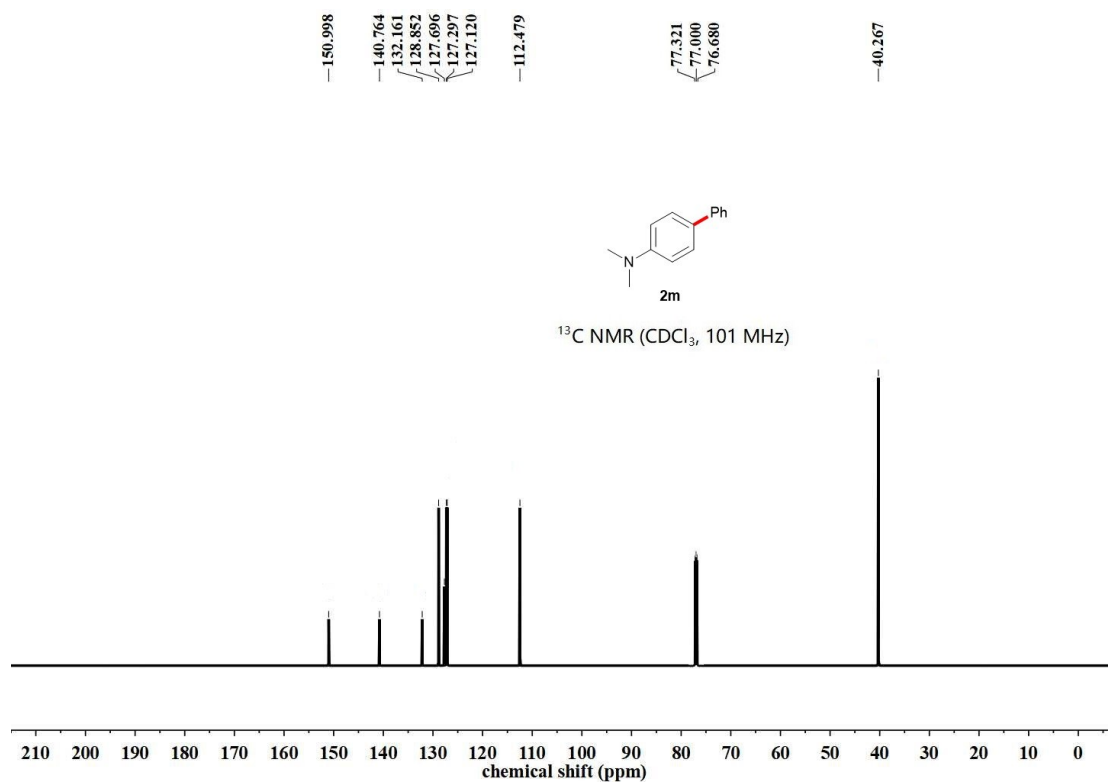

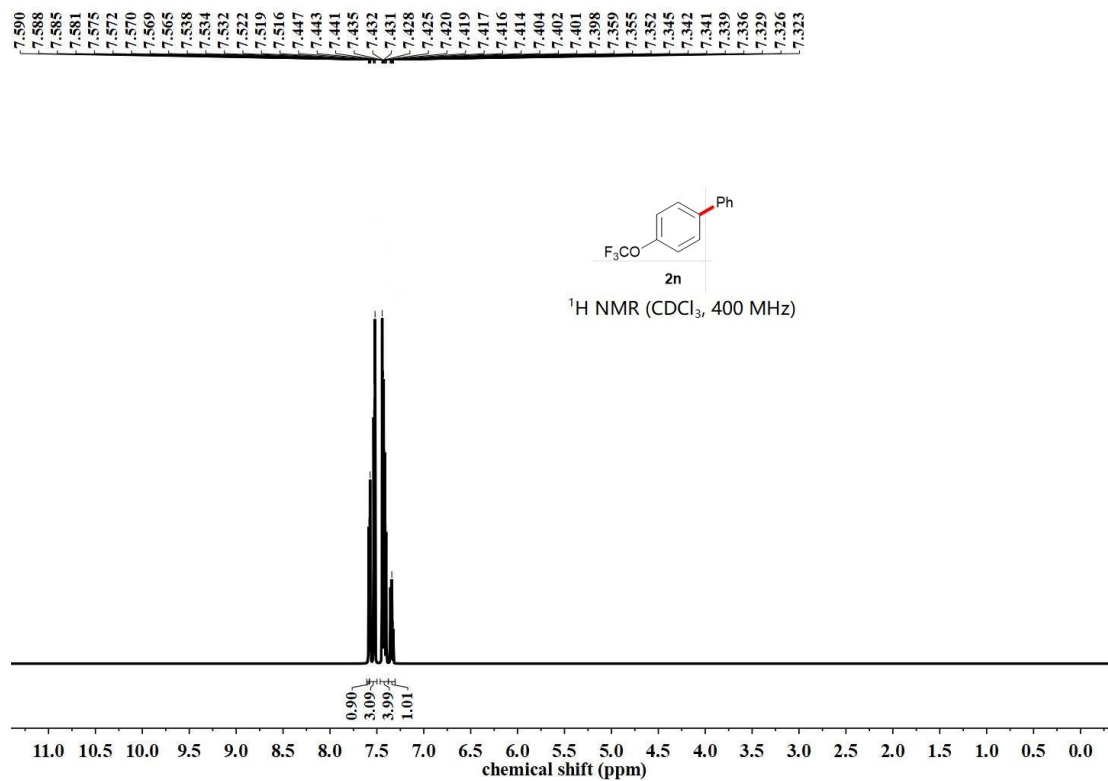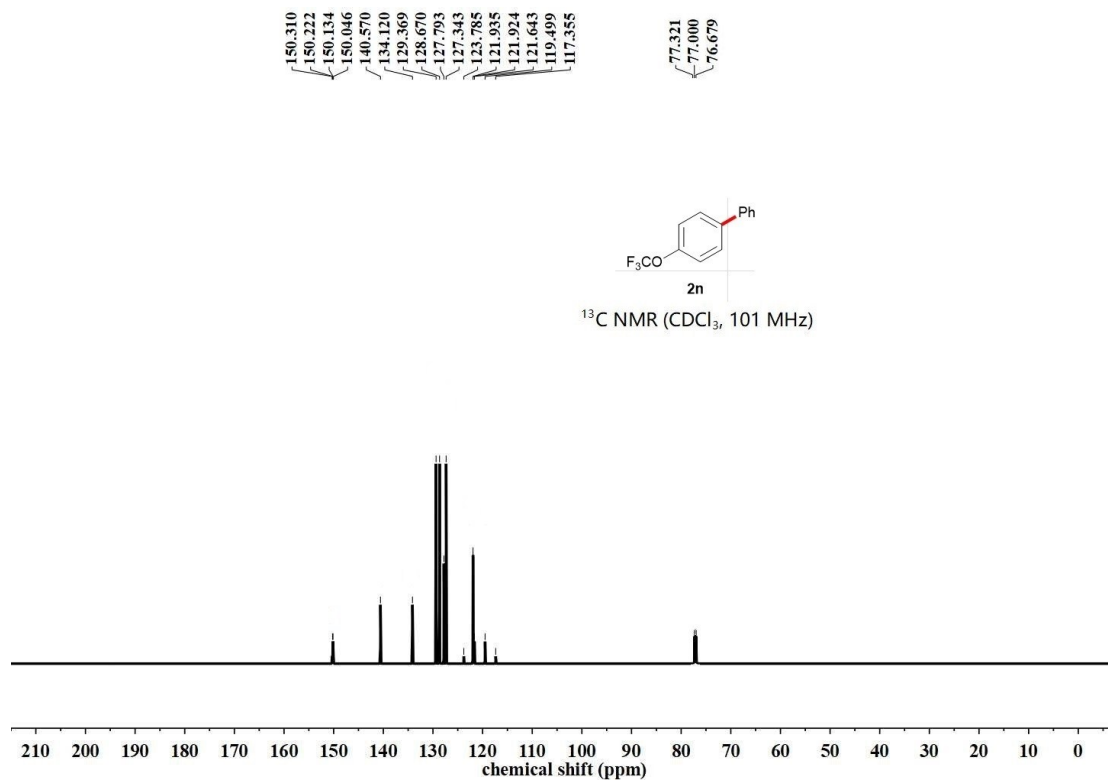

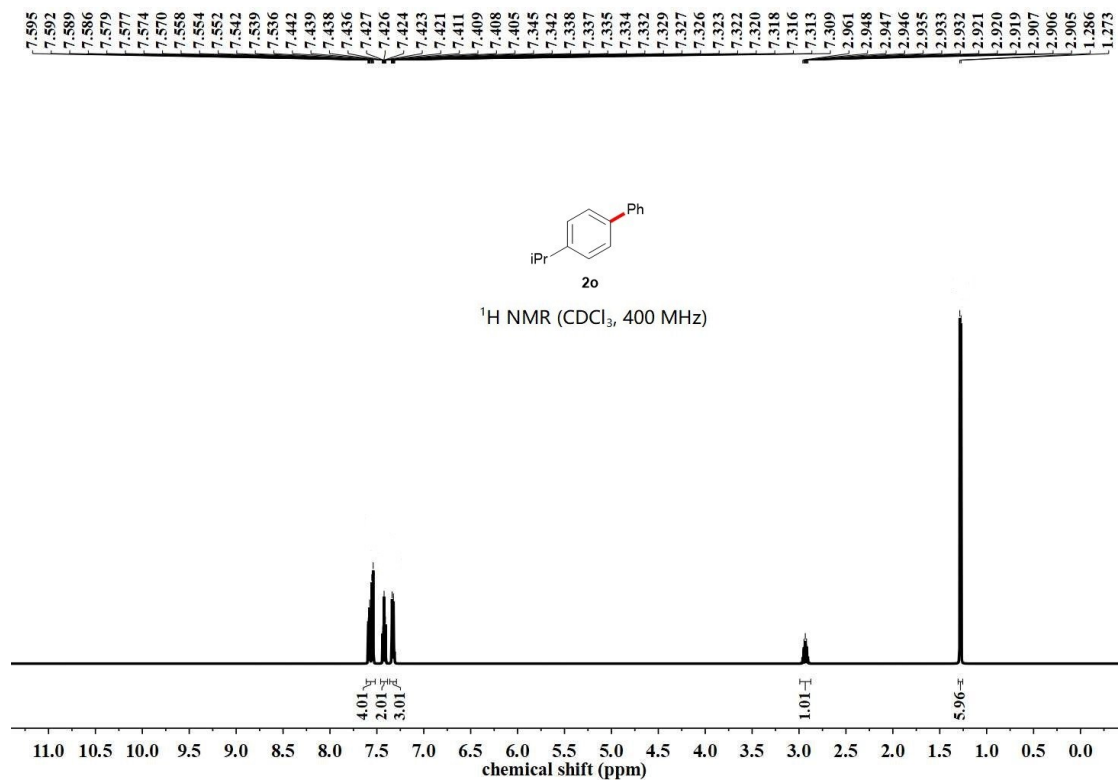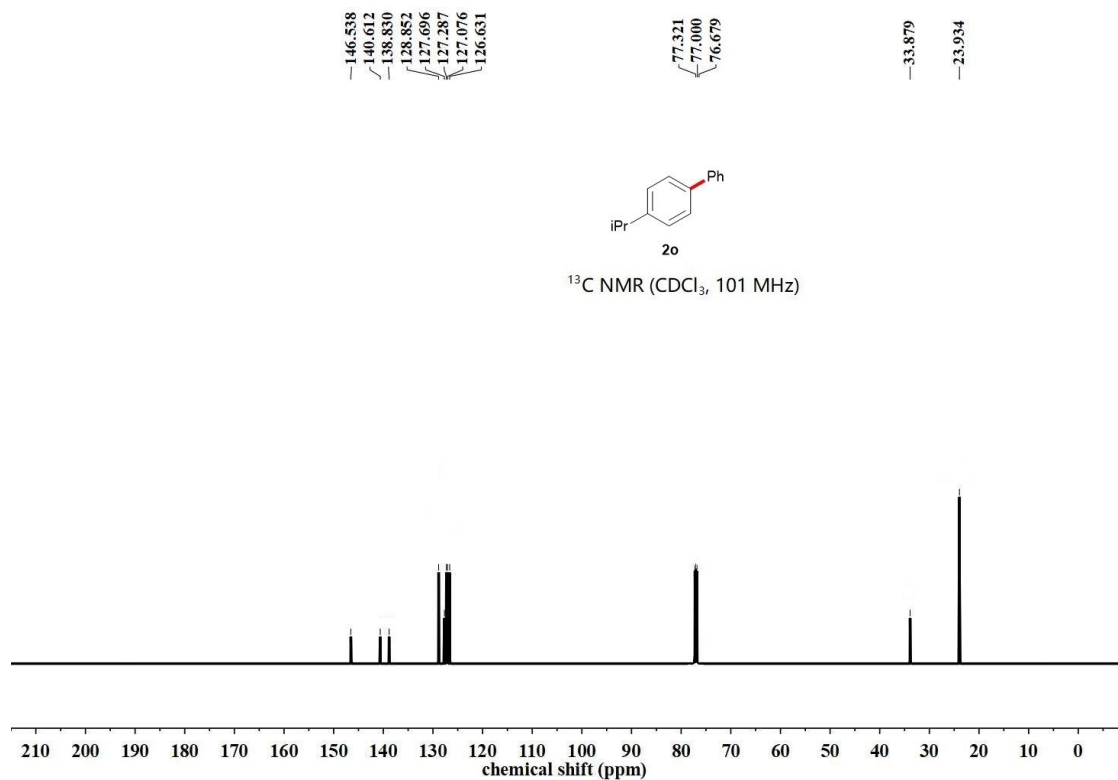

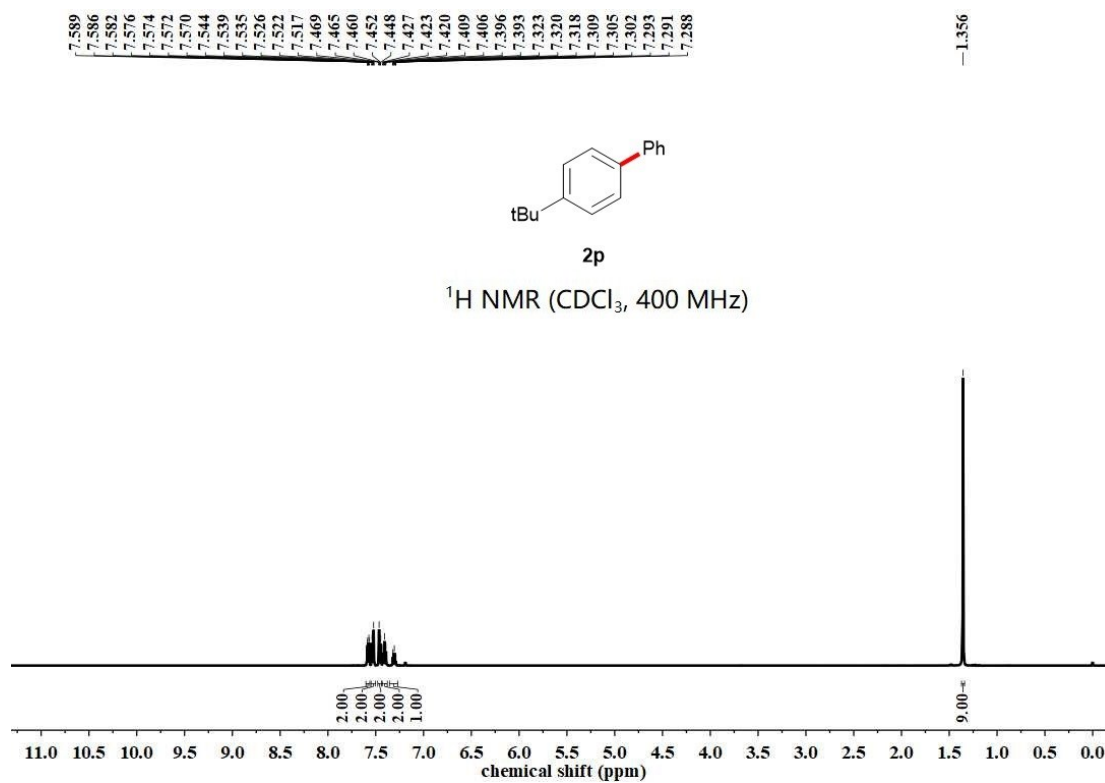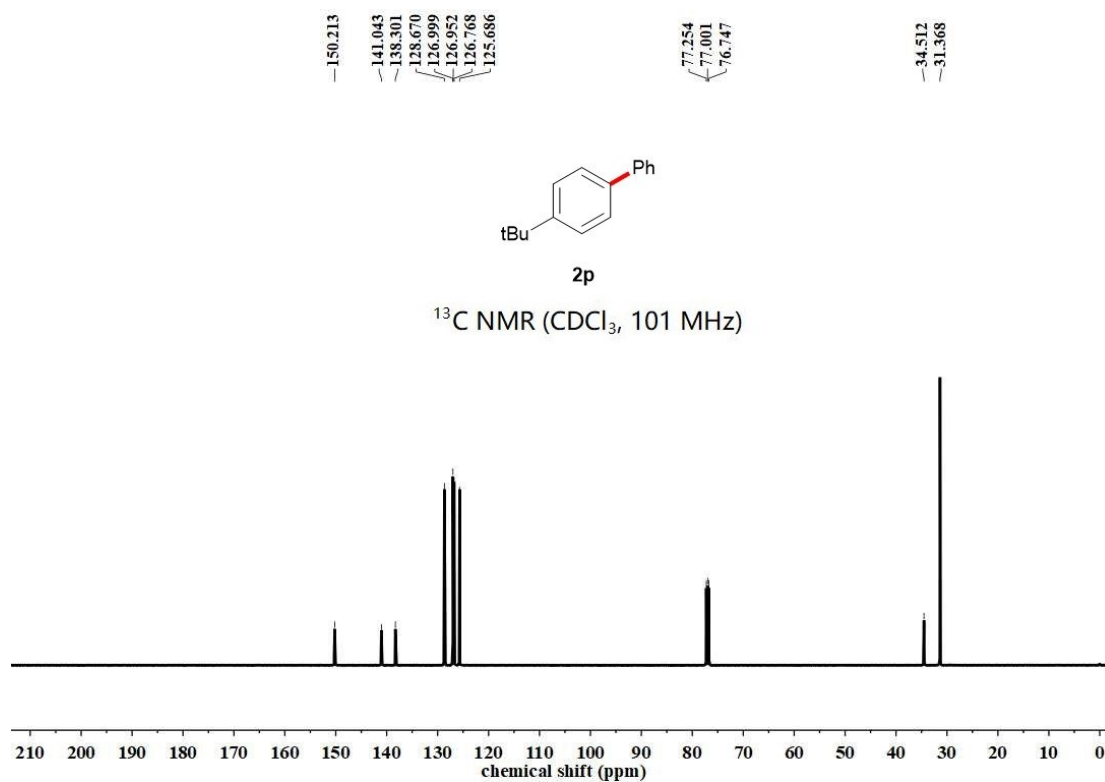

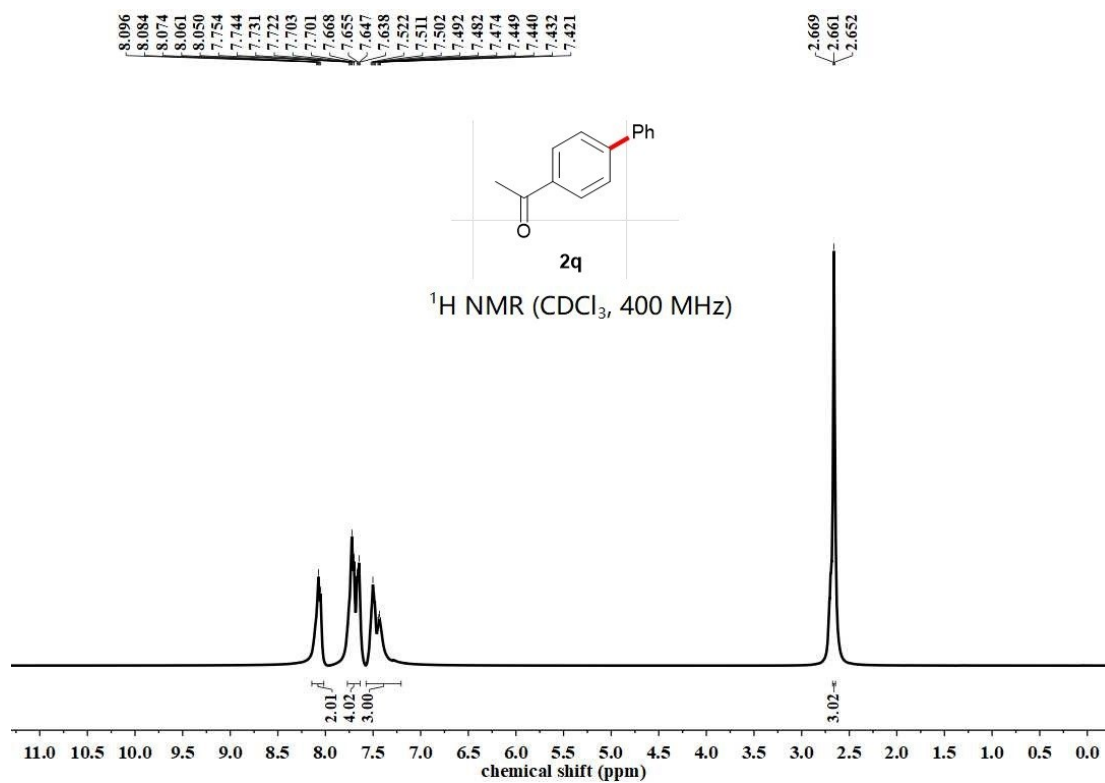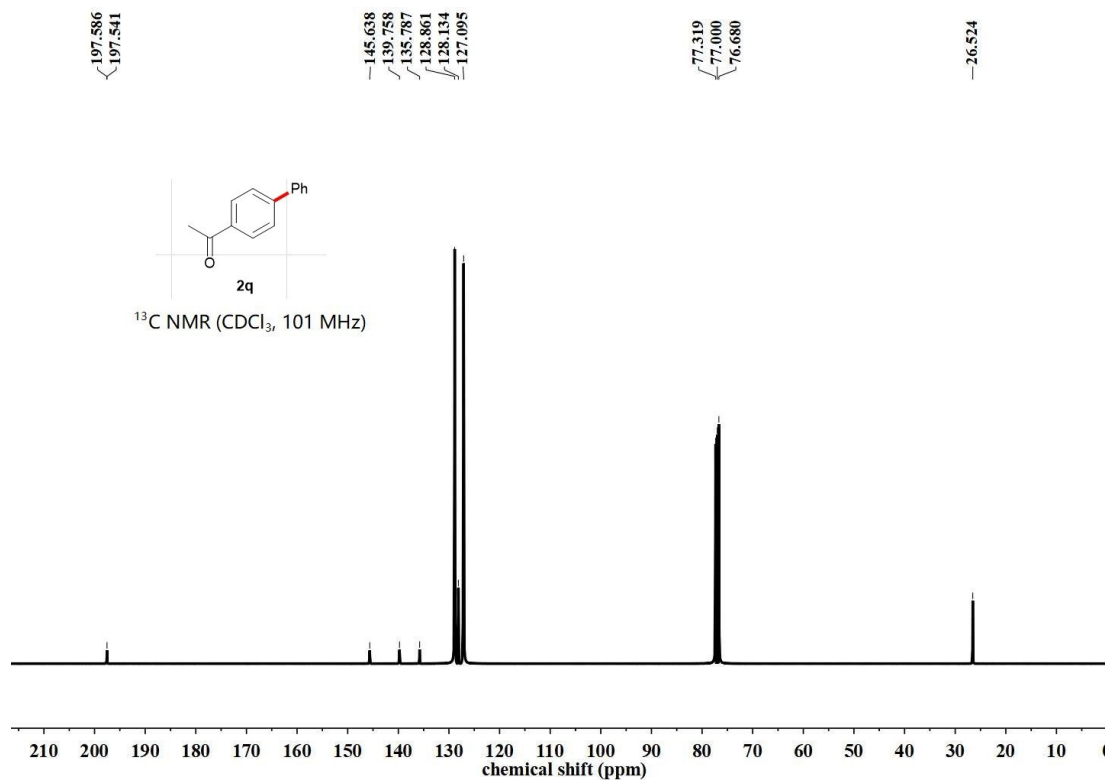

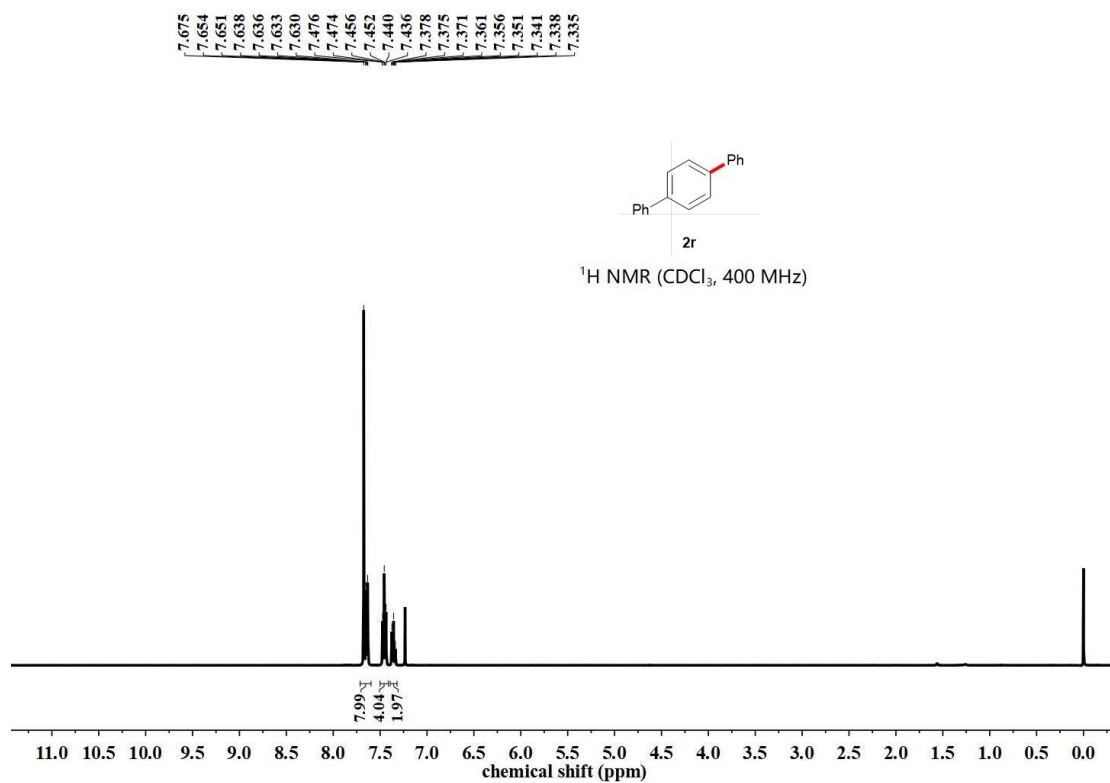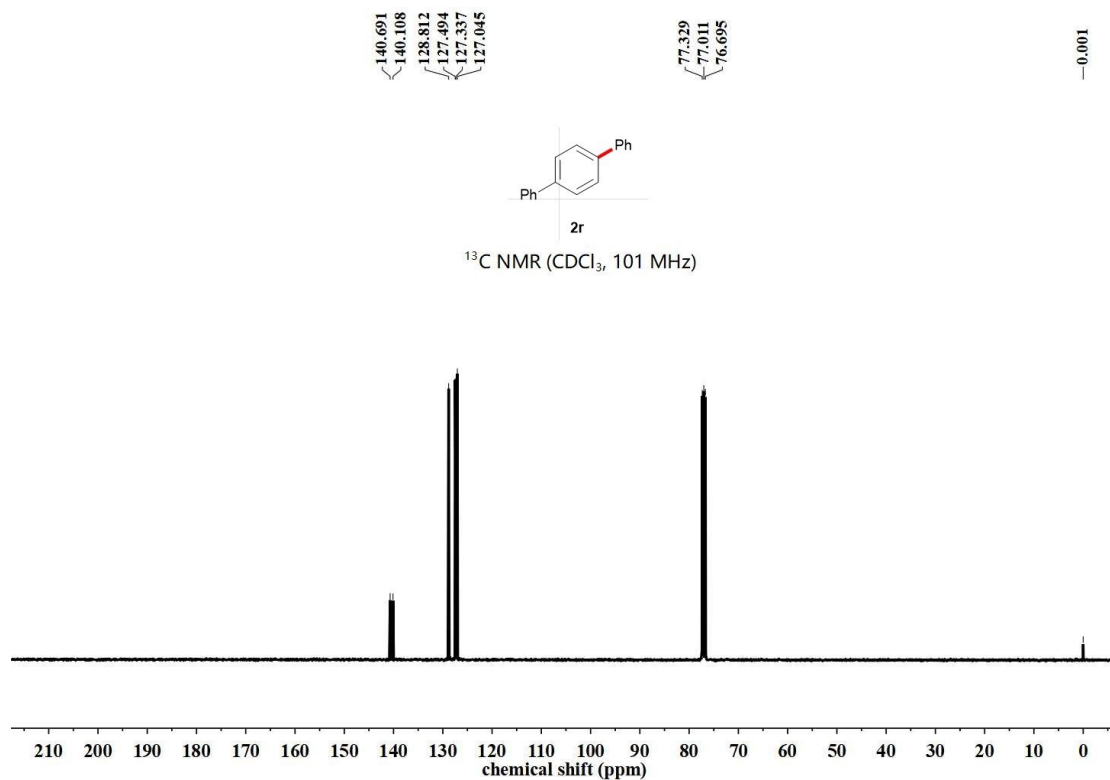

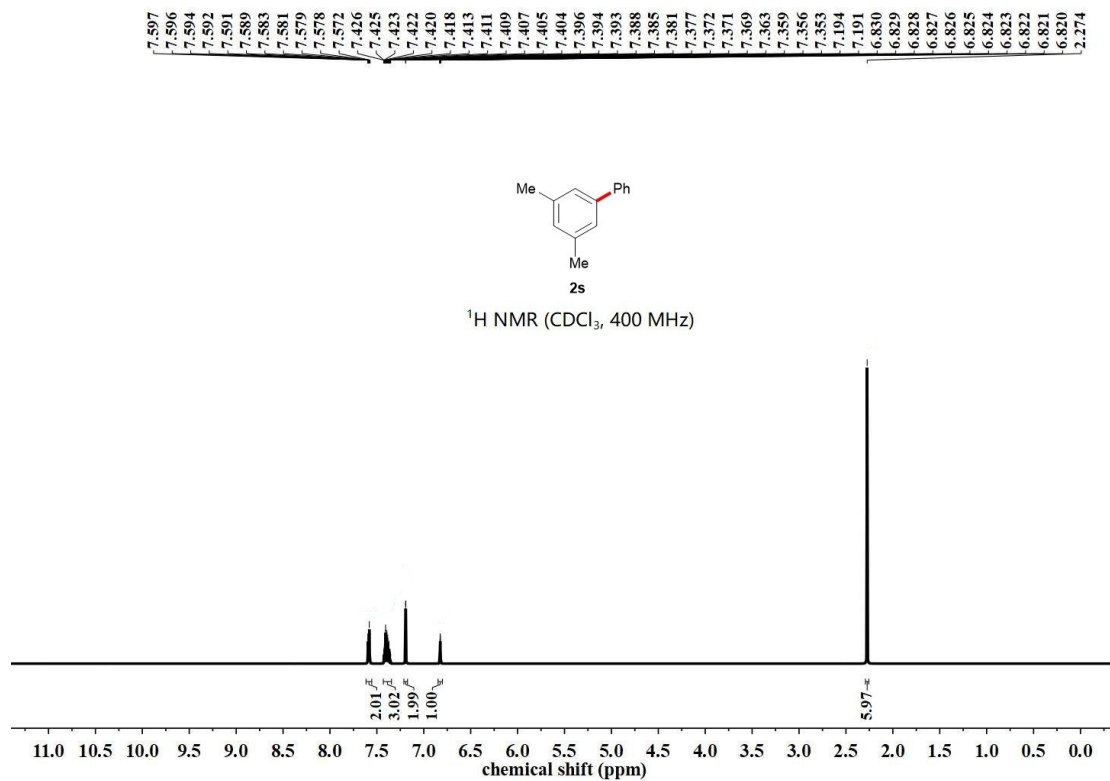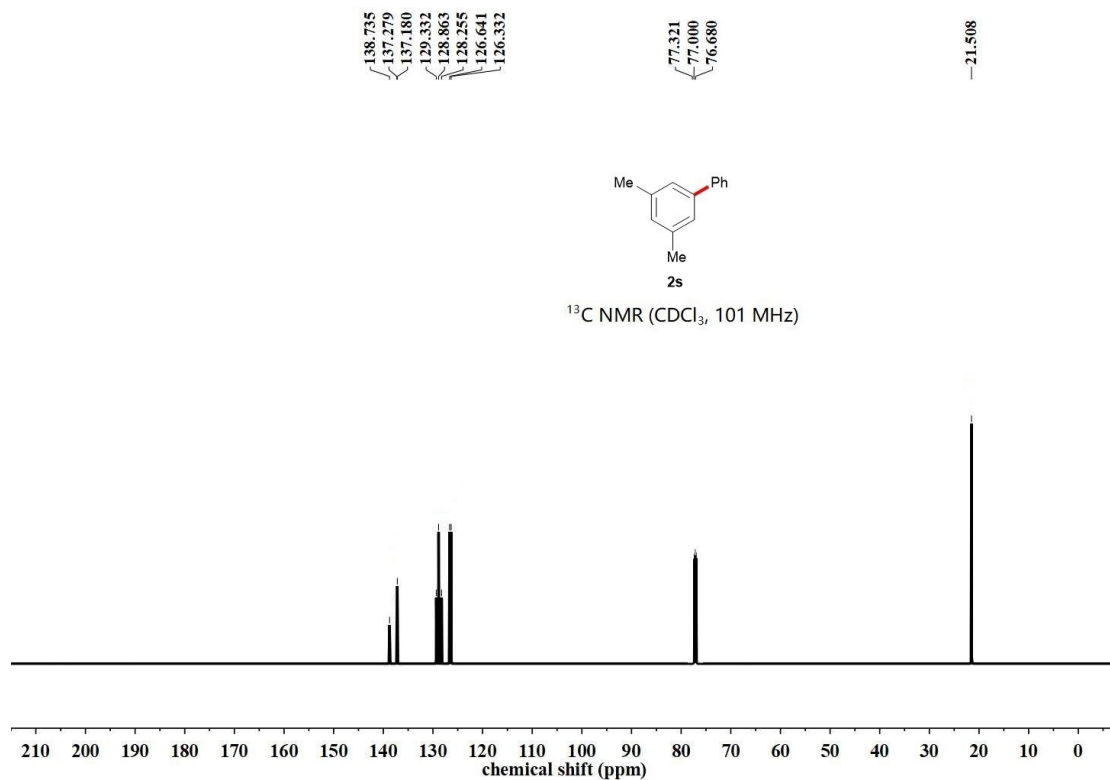



8.008  
8.007  
8.006  
8.005  
8.004  
7.993  
7.992  
7.990  
7.989  
7.984  
7.983  
7.969  
7.968  
7.967  
7.963  
7.901  
7.888  
7.886  
7.772  
7.701  
7.700  
7.698  
7.697  
7.695  
7.618  
7.616  
7.615  
7.605  
7.603  
7.601  
7.600  
7.540  
7.539  
7.536  
7.535  
7.524  
7.503  
7.501  
7.500  
7.490  
7.489  
7.486  
7.475  
7.474  
7.472  
7.471  
7.450  
7.449  
7.448  
7.435  
7.434  
7.432  
7.422  
7.420  
7.419  
7.385  
7.372  
7.371  
7.369

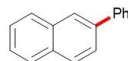

2t

<sup>1</sup>H NMR (CDCl<sub>3</sub>, 400 MHz)

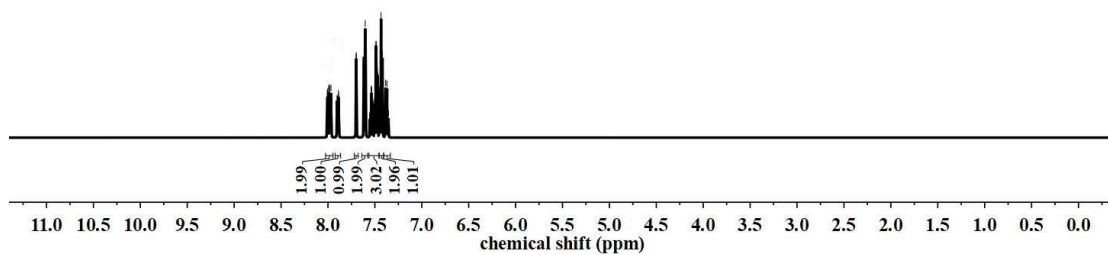

140.810  
138.054  
133.712  
133.563  
128.476  
128.289  
127.913  
127.862  
127.799  
127.581  
126.706  
126.290  
125.943  
125.912

77.318  
77.001  
76.681

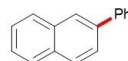

2t

<sup>13</sup>C NMR (CDCl<sub>3</sub>, 101 MHz)

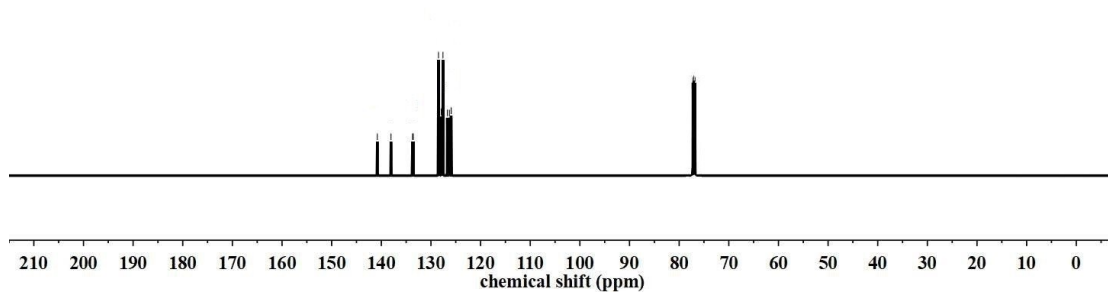

7.712  
7.709  
7.691  
7.688  
7.476  
7.473  
7.453  
7.433  
7.396  
7.393  
7.387  
7.384  
7.353  
7.349  
7.335  
7.164  
7.154  
7.151  
7.140

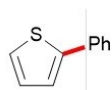

2u

$^1\text{H NMR}$  ( $\text{CDCl}_3$ , 400 MHz)

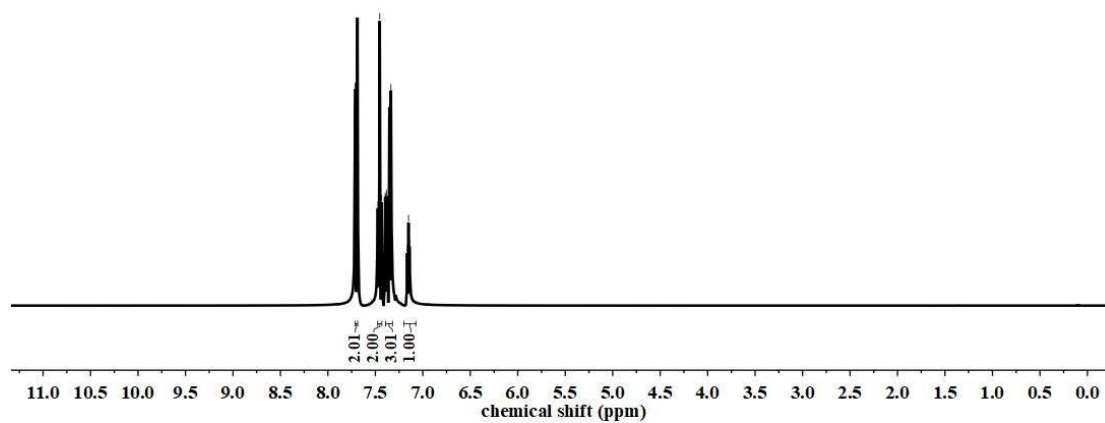

144.503  
134.487  
128.933  
128.043  
127.506  
126.021  
124.841  
123.134

77.416  
77.097  
76.778

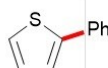

2u

$^{13}\text{C NMR}$  ( $\text{CDCl}_3$ , 101 MHz)

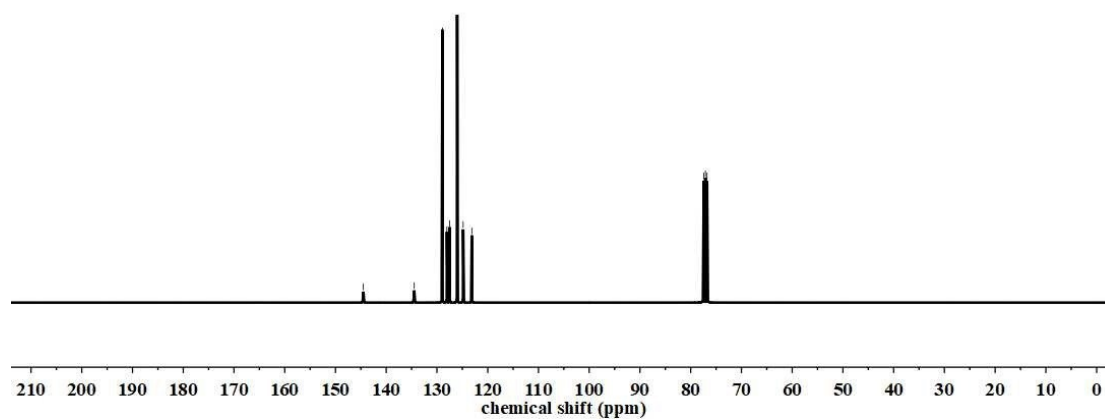

7.577  
7.576  
7.574  
7.572  
7.569  
7.562  
7.560  
7.558  
7.557  
7.553  
7.452  
7.449  
7.447  
7.444  
7.425  
7.423  
7.422  
7.421  
7.419  
7.412  
7.410  
7.408  
7.407  
7.405  
7.397  
7.395  
7.393  
7.392  
7.388  
7.362  
7.358  
7.355  
7.349  
7.345  
7.344  
7.343  
7.339  
7.332  
7.329  
7.326  
7.238  
7.235  
7.223  
7.220

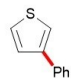

2v

$^1\text{H}$  NMR ( $\text{CDCl}_3$ , 400 MHz)

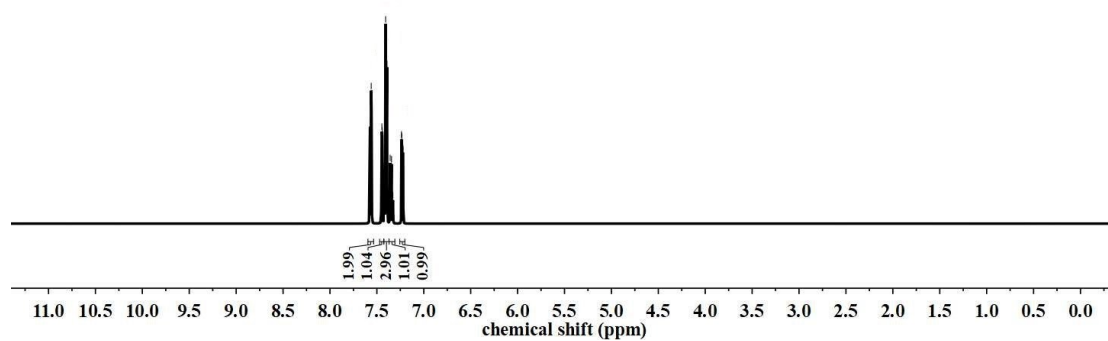

142.832  
137.115  
128.838  
127.455  
127.347  
125.918  
125.355  
122.707  
77.321  
77.000  
76.680

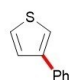

2v

$^{13}\text{C}$  NMR ( $\text{CDCl}_3$ , 101 MHz)

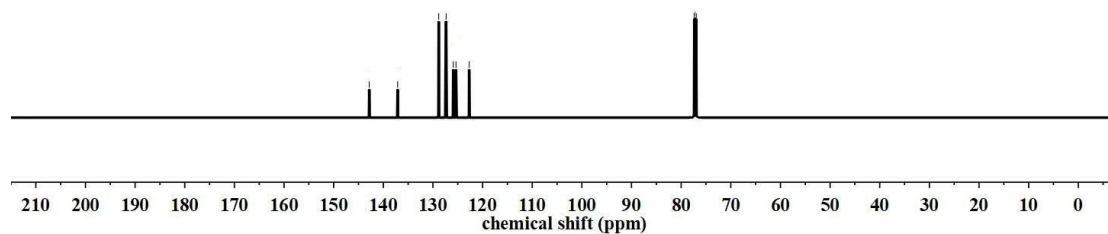

8.731  
8.728  
8.725  
8.721  
8.718  
8.716  
8.050  
8.047  
8.036  
8.032  
8.030  
7.718  
7.715  
7.710  
7.706  
7.702  
7.515  
7.511  
7.501  
7.497  
7.488  
7.485  
7.452  
7.449  
7.447  
7.439  
7.435  
7.430  
7.423  
7.420  
7.217  
7.212  
7.207  
7.202  
7.200  
7.196  
7.190

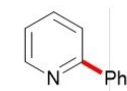

2w

$^1\text{H NMR}$  ( $\text{CDCl}_3$ , 400 MHz)

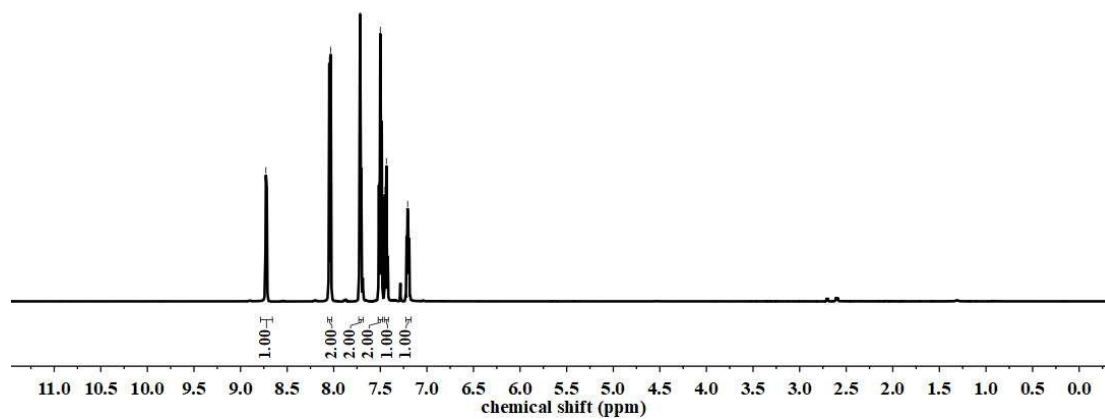

-157.195  
-149.456  
-139.199  
-136.508  
-128.753  
-128.548  
-126.706  
-121.885  
-120.304

77.255  
77.000  
76.746

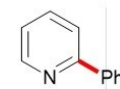

2w

$^{13}\text{C NMR}$  ( $\text{CDCl}_3$ , 101 MHz)

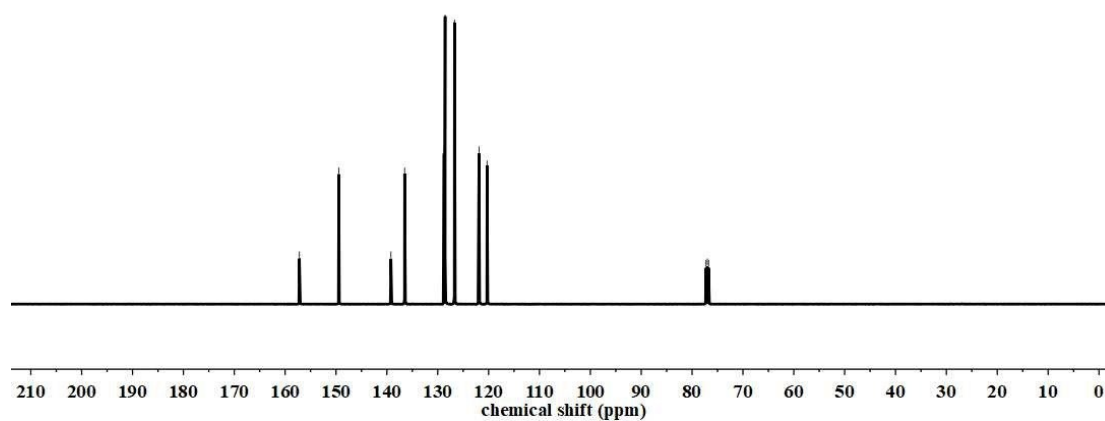

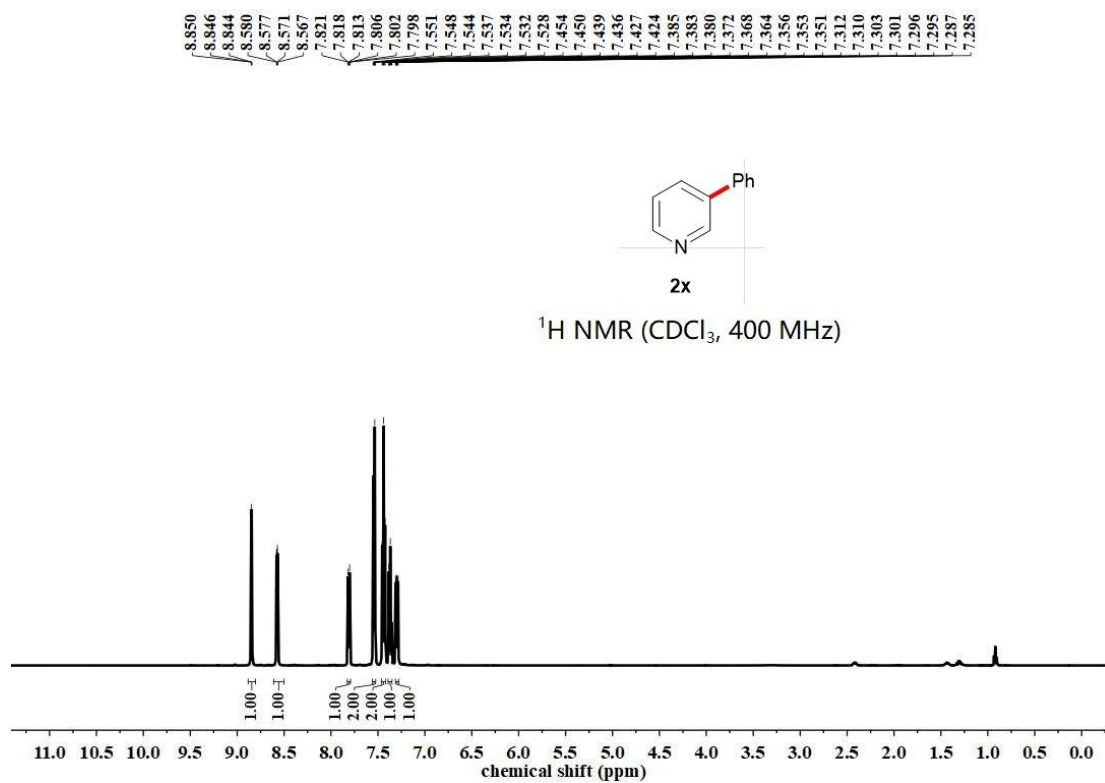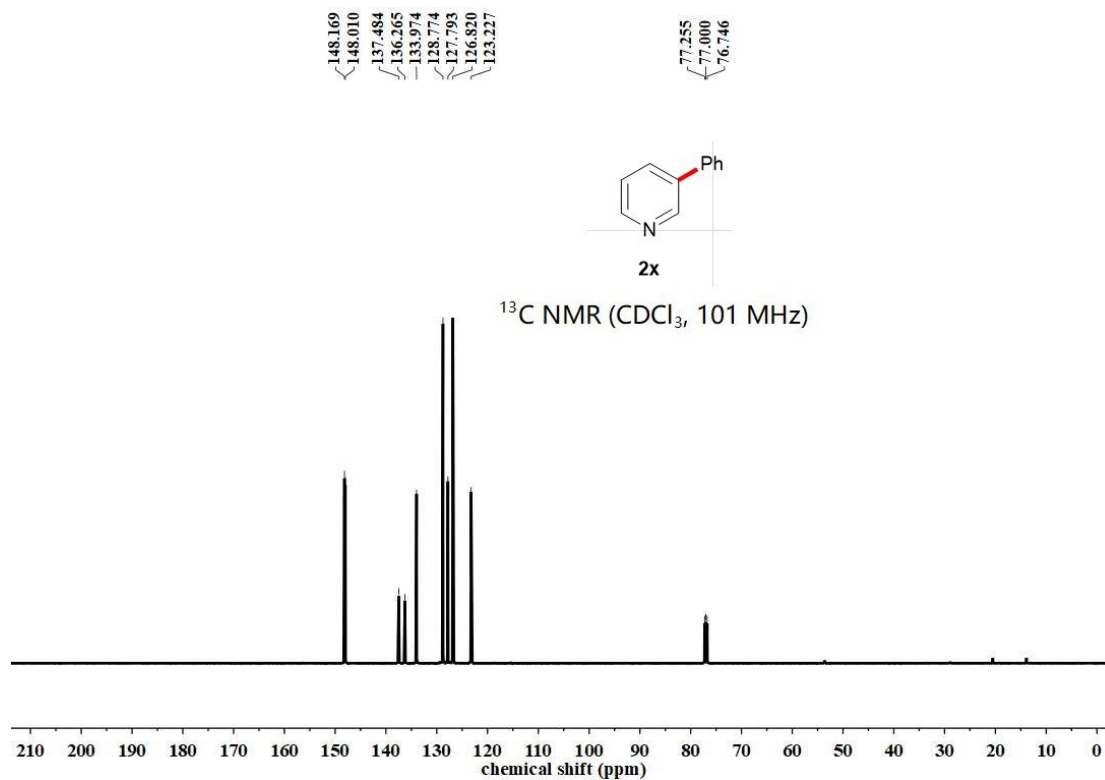

8.663  
8.659  
8.652  
8.646  
7.806  
7.801  
7.788  
7.784  
7.781  
7.708  
7.703  
7.696  
7.690  
7.546  
7.541  
7.524  
7.519  
7.504  
7.493  
7.490  
7.486  
7.470  
7.453  
7.450

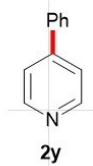

<sup>1</sup>H NMR (DMSO-d<sub>6</sub>, 400 MHz)

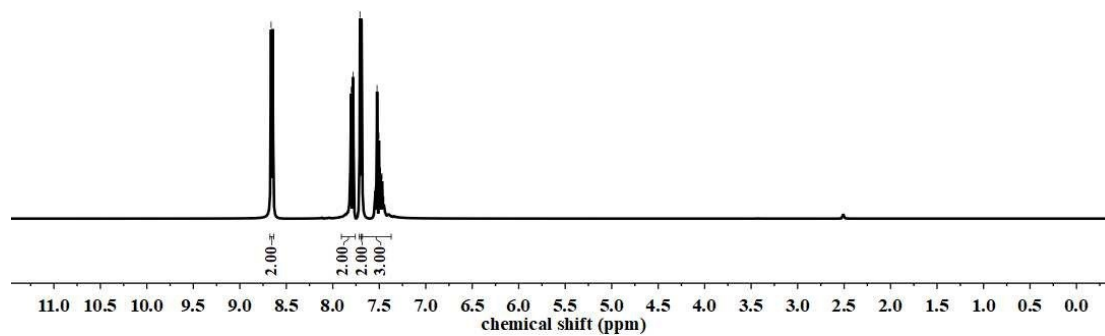

8.663  
8.659  
8.652  
8.646  
7.806  
7.801  
7.788  
7.784  
7.781  
7.708  
7.703  
7.696  
7.690  
7.546  
7.541  
7.524  
7.519  
7.504  
7.493  
7.490  
7.486  
7.470  
7.453  
7.450

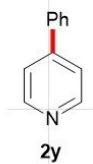

<sup>1</sup>H NMR (DMSO-d<sub>6</sub>, 400 MHz)

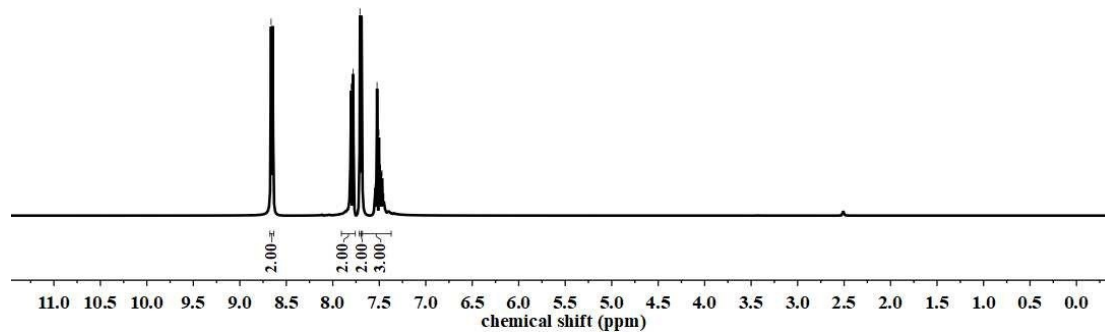

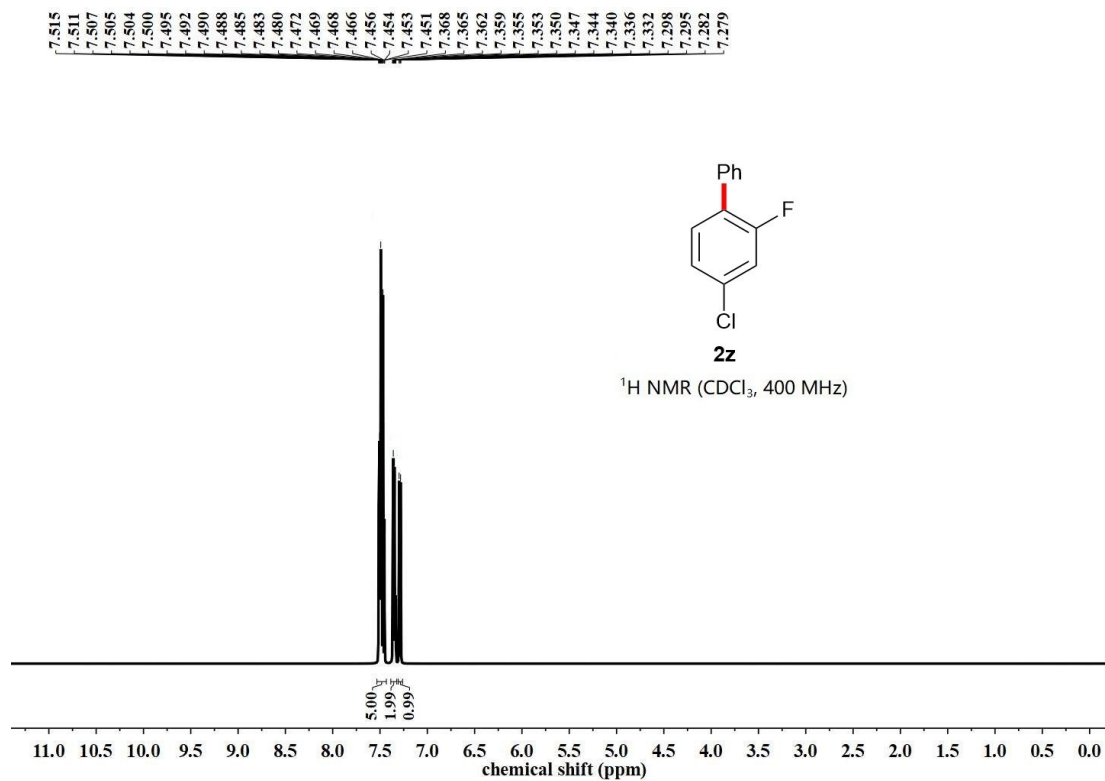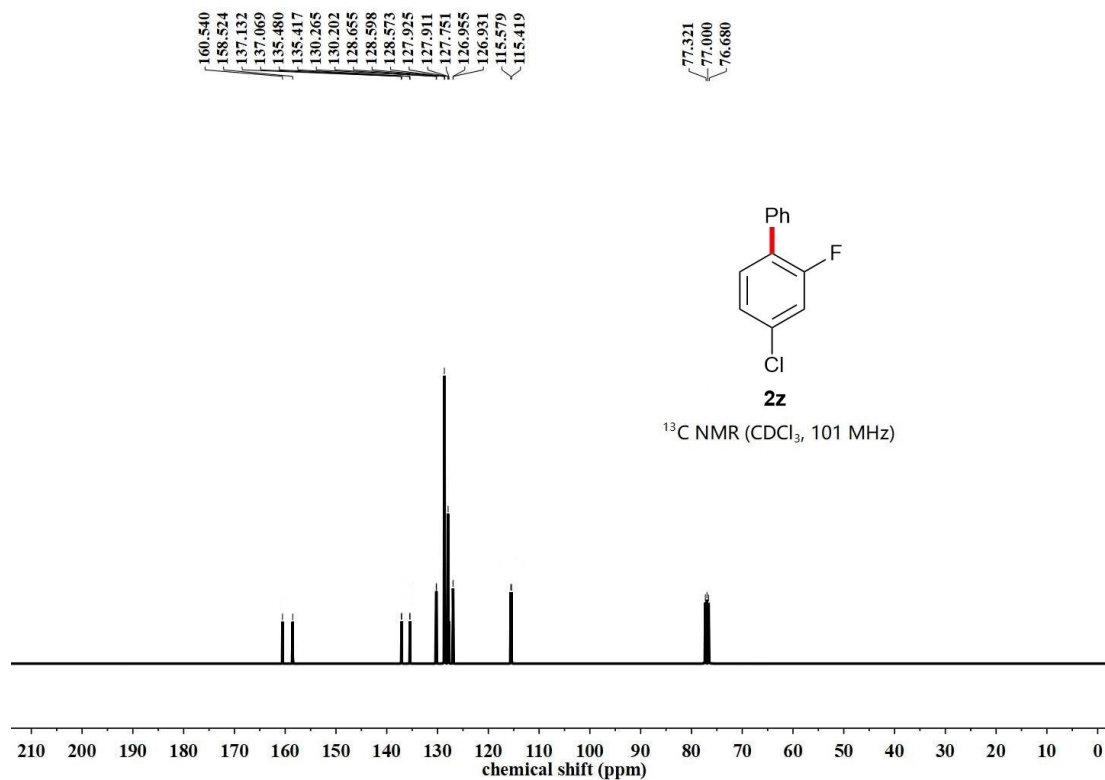

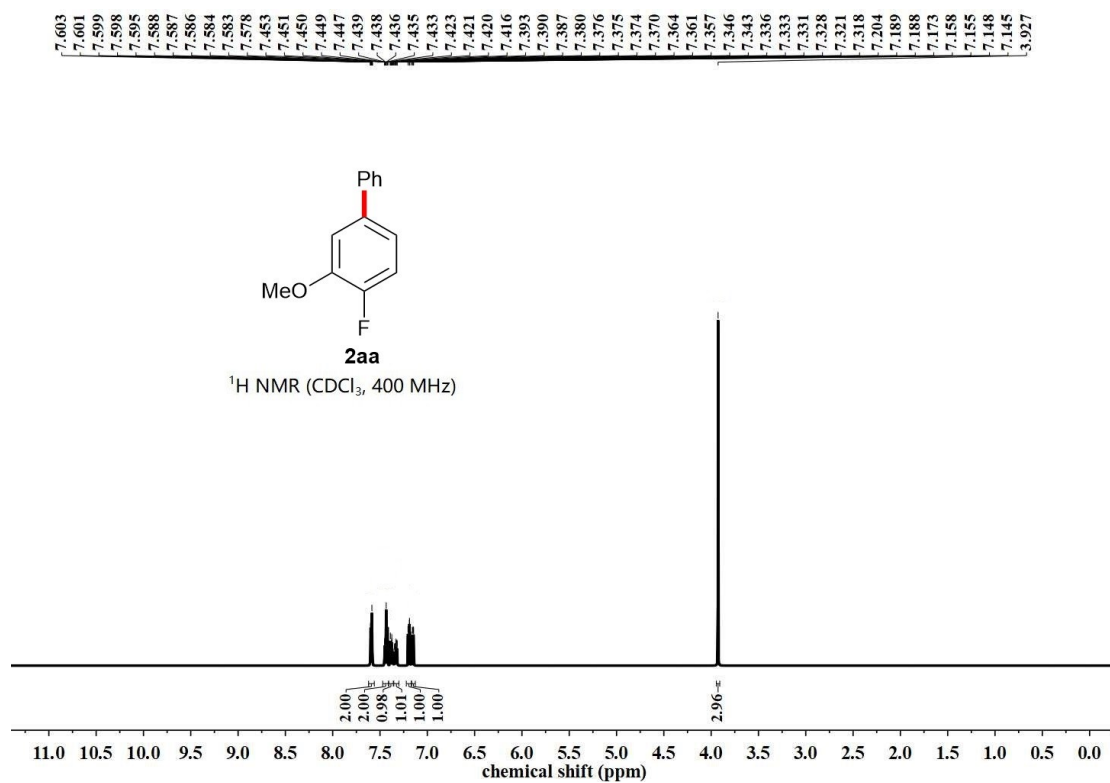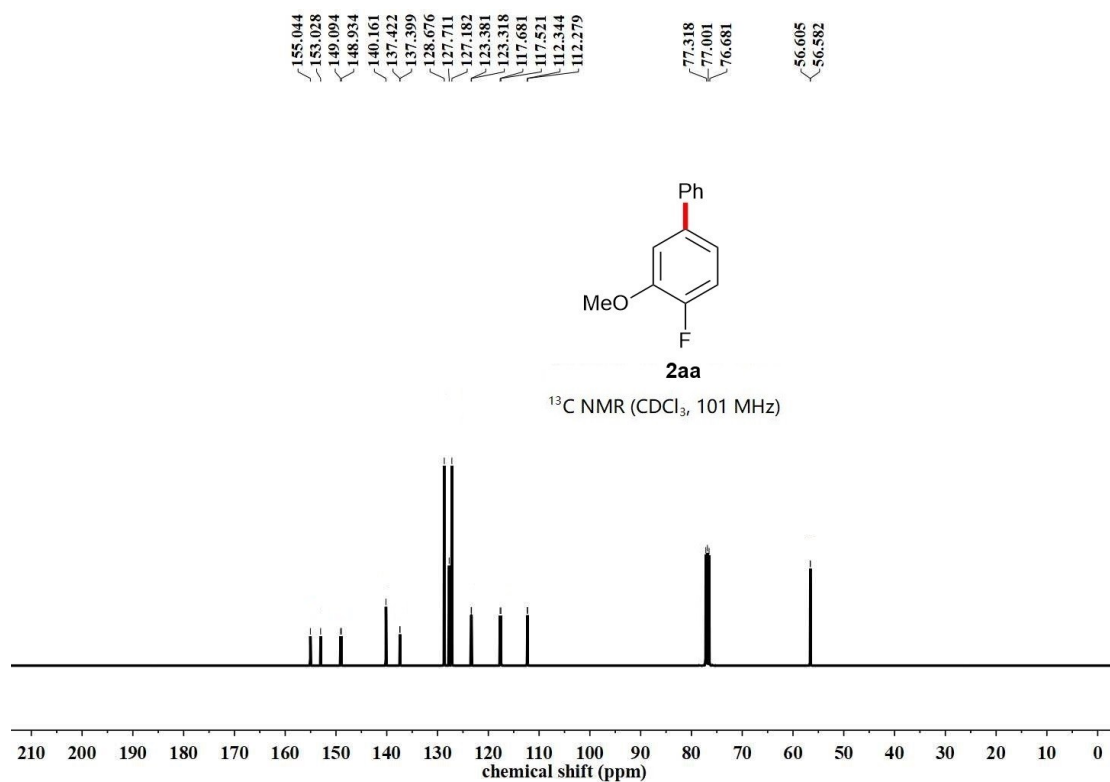



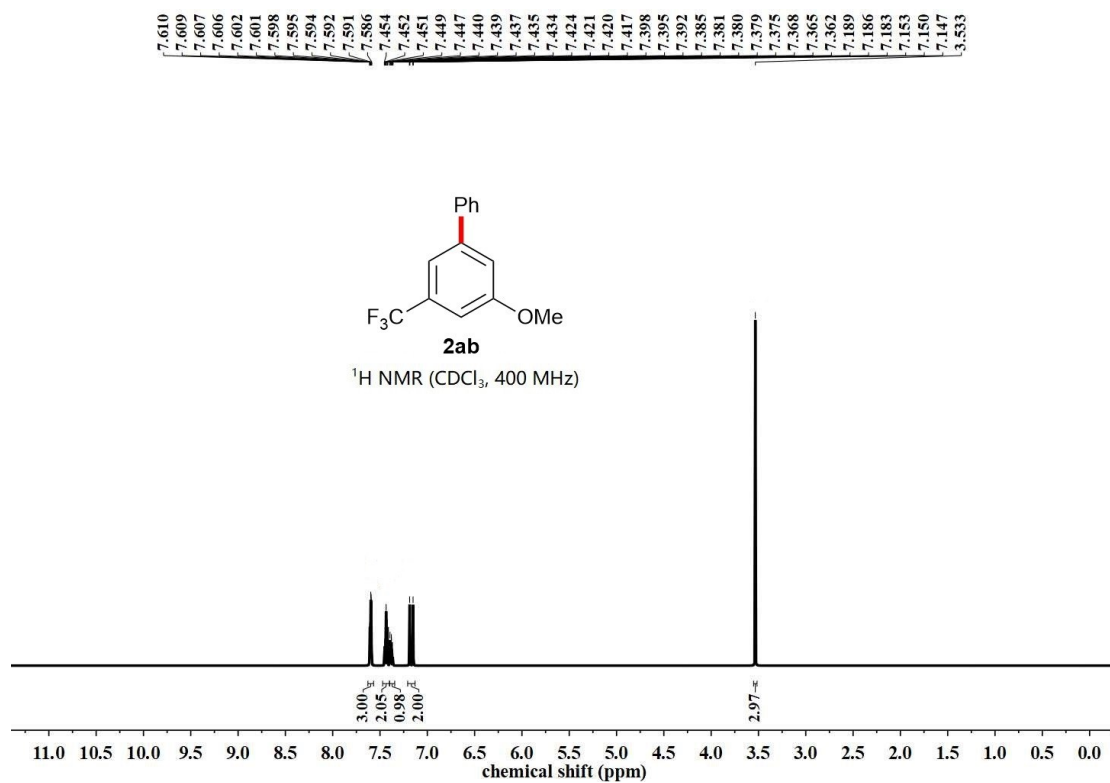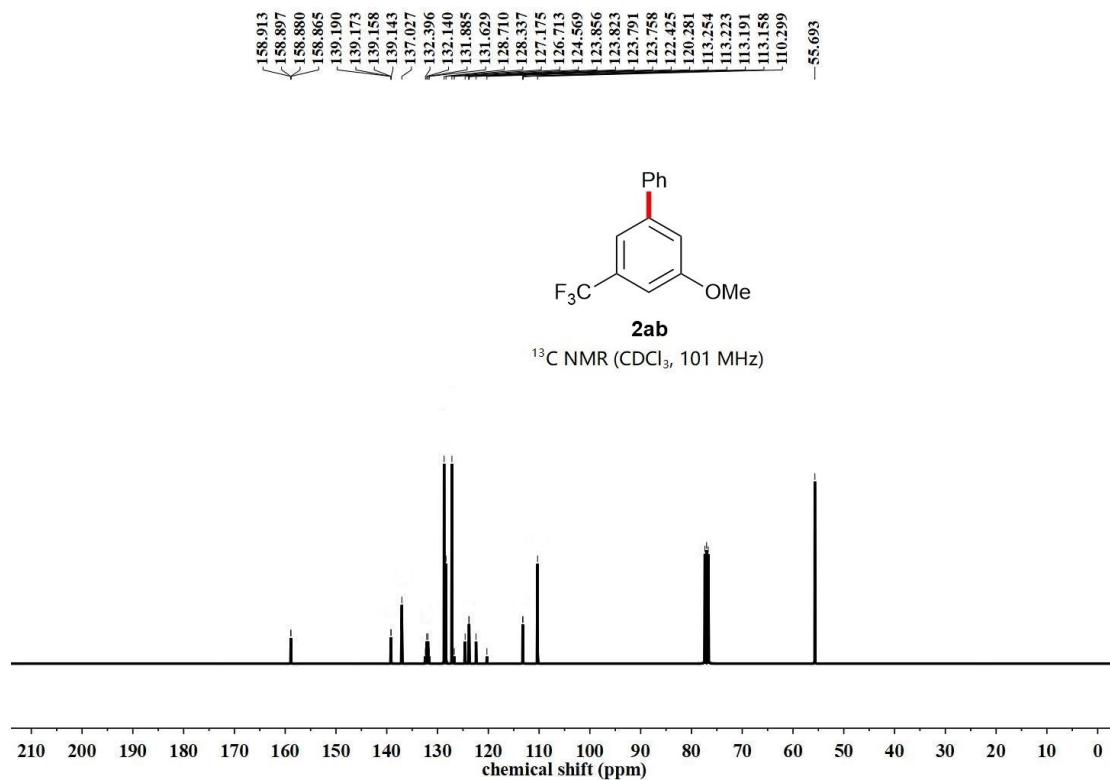

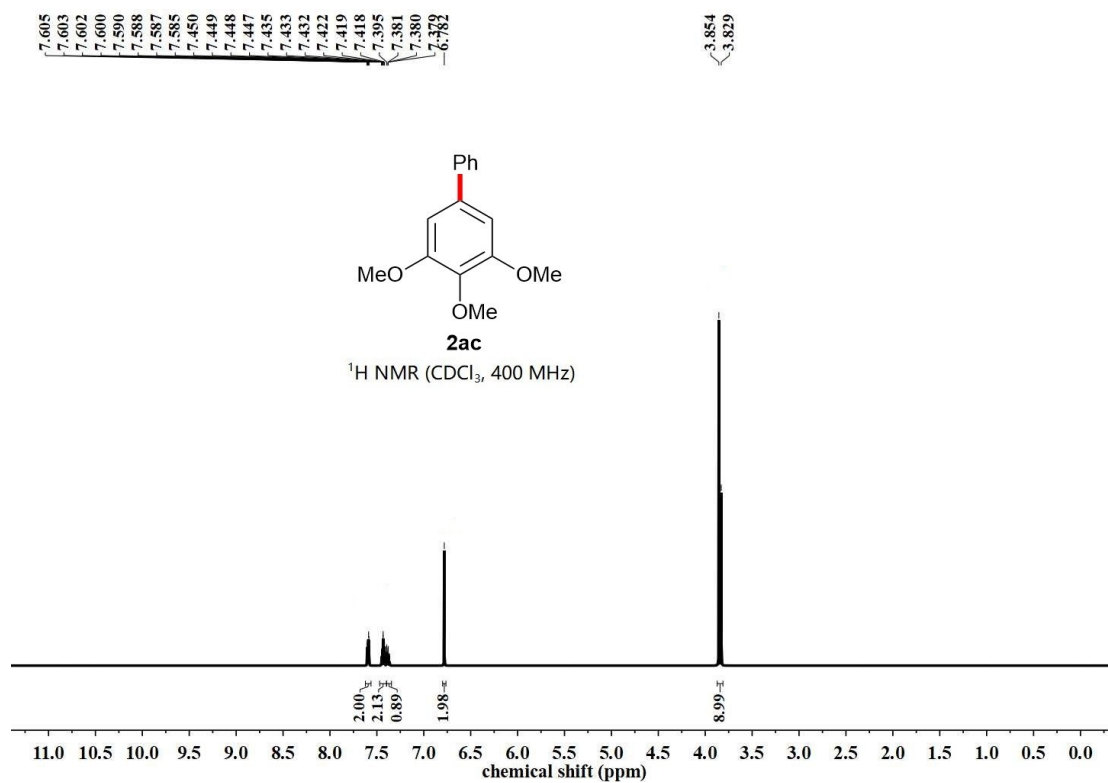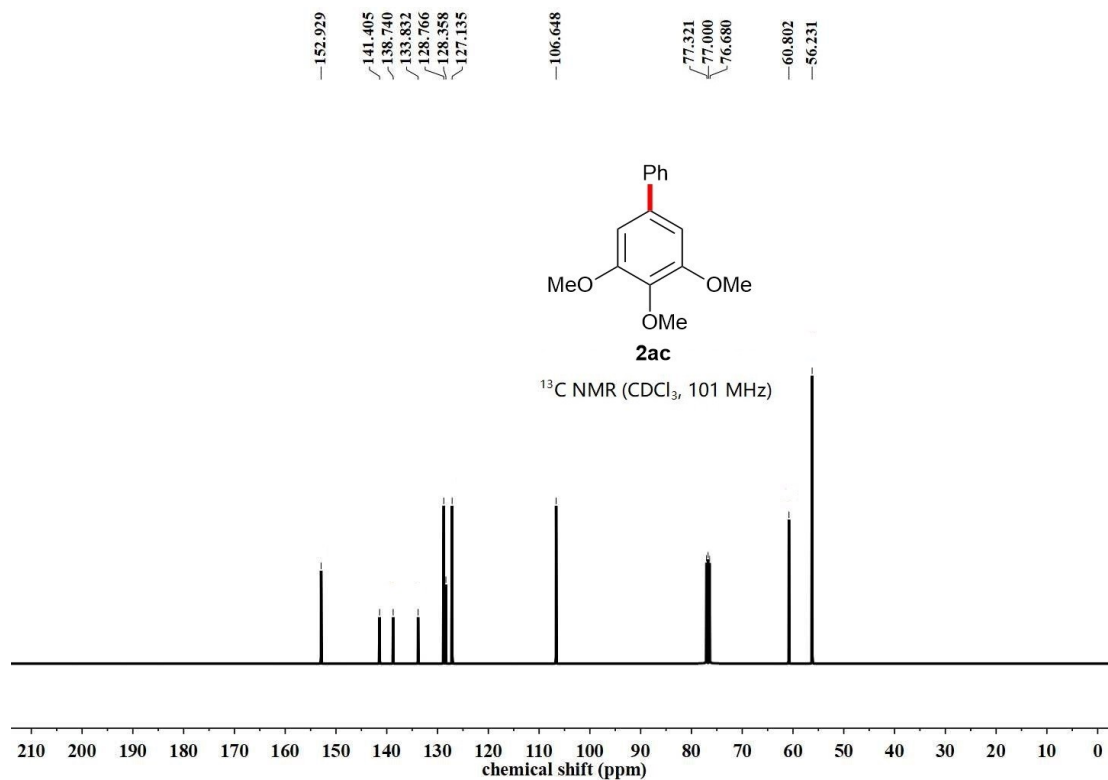

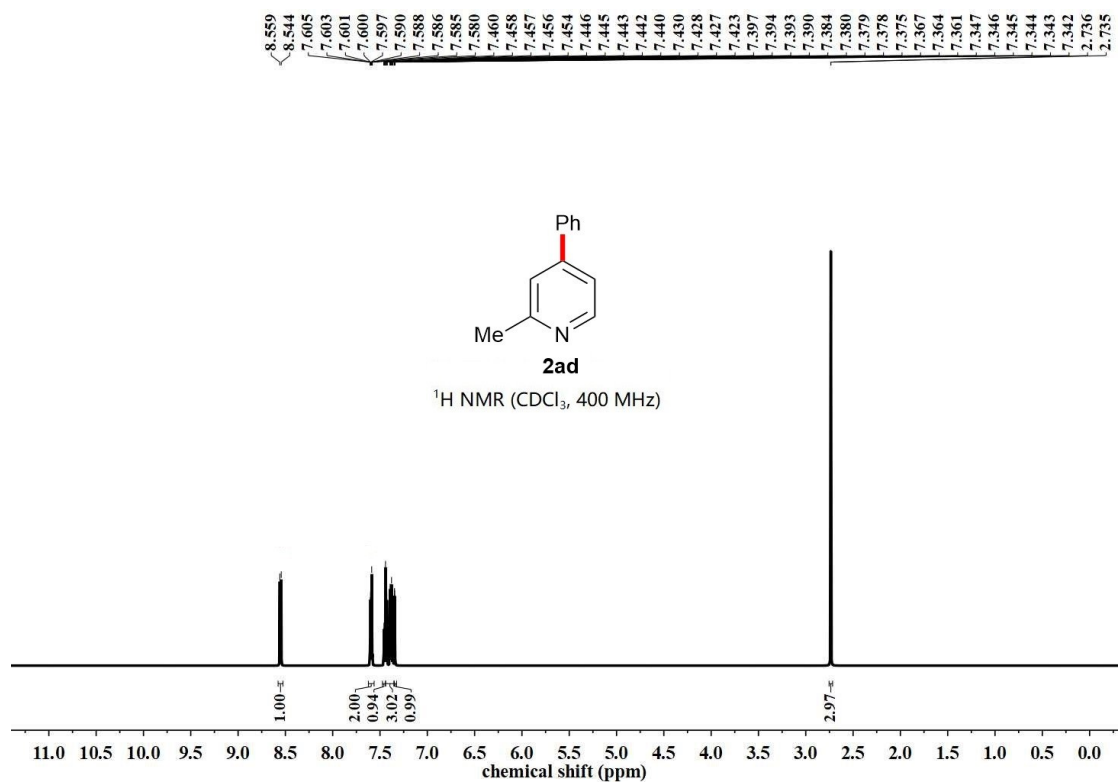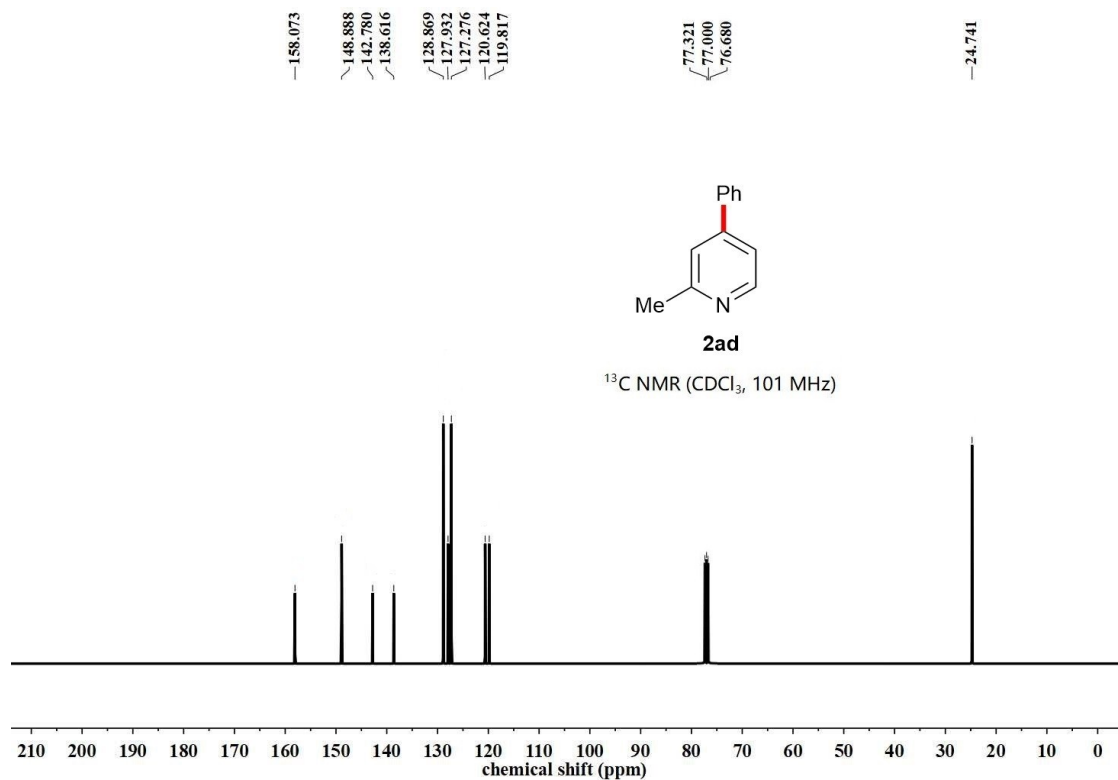



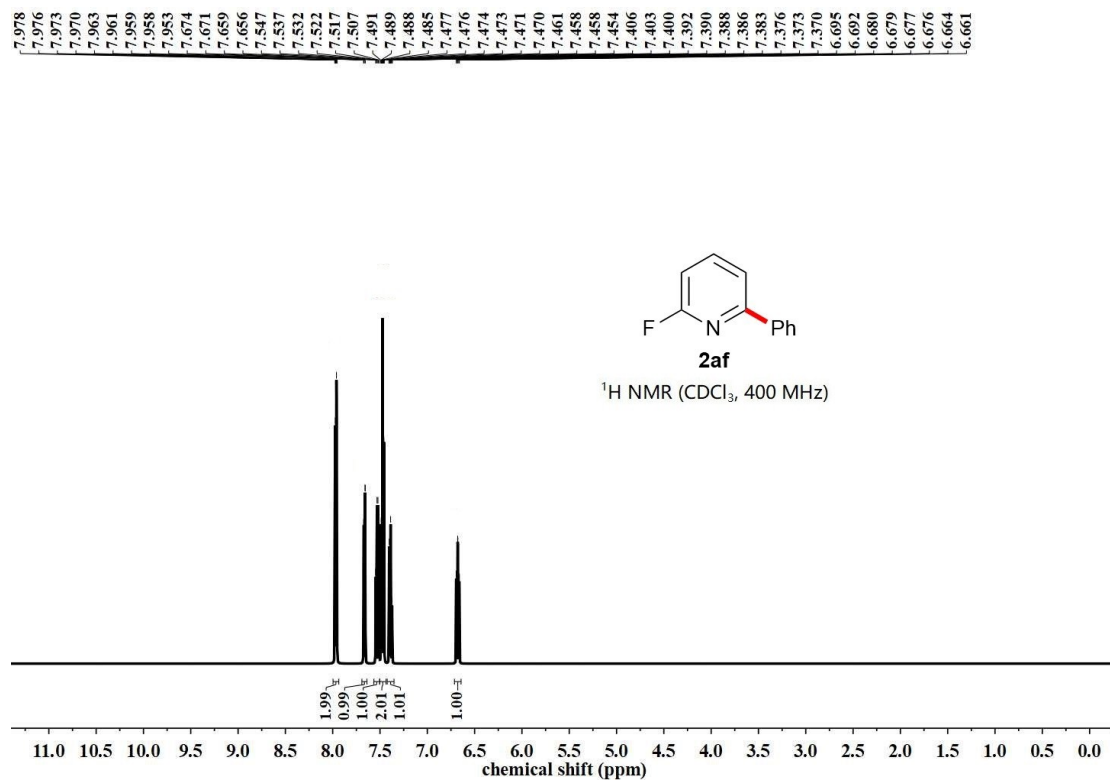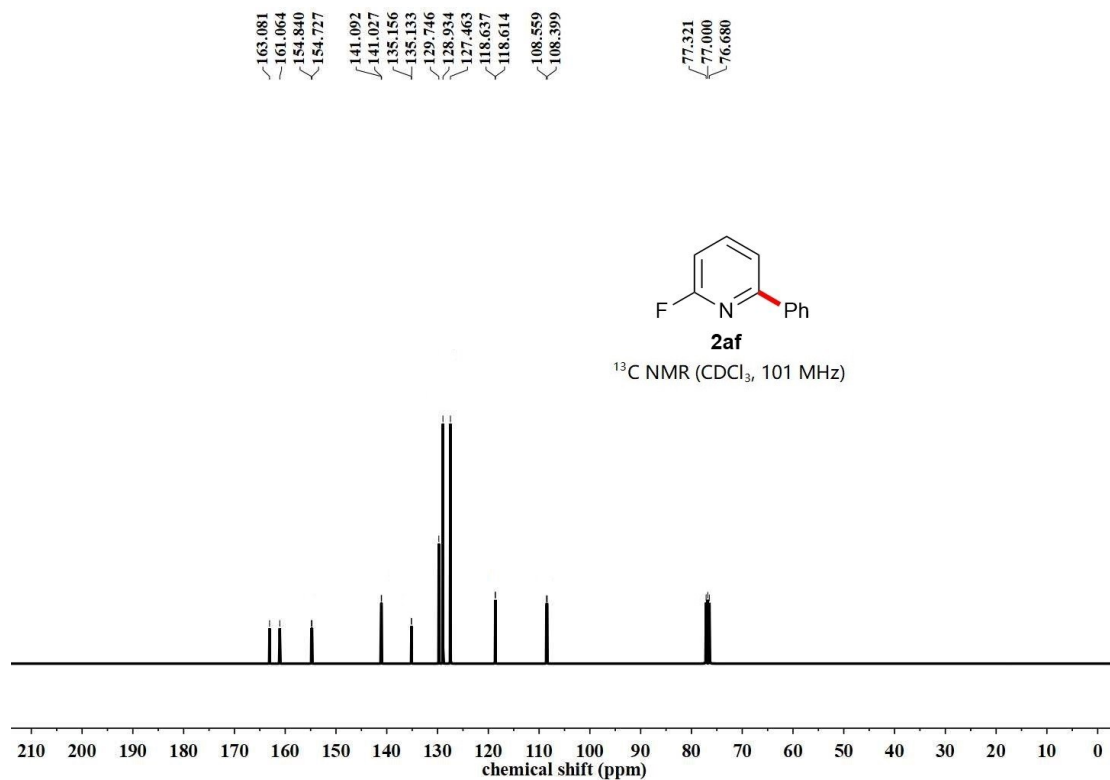

8.511  
8.510  
8.508  
8.507  
8.142  
8.141  
8.139  
8.138  
7.551  
7.549  
7.547  
7.546  
7.543  
7.536  
7.534  
7.532  
7.531  
7.526  
7.485  
7.482  
7.479  
7.445  
7.443  
7.442  
7.441  
7.439  
7.431  
7.430  
7.428  
7.427  
7.425  
7.415  
7.413  
7.412  
7.408  
7.390  
7.387  
7.384  
7.378  
7.373  
7.372  
7.371  
7.367  
7.361  
7.358  
7.355  
5.946

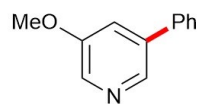

**2ag**

<sup>1</sup>H NMR (CDCl<sub>3</sub>, 400 MHz)

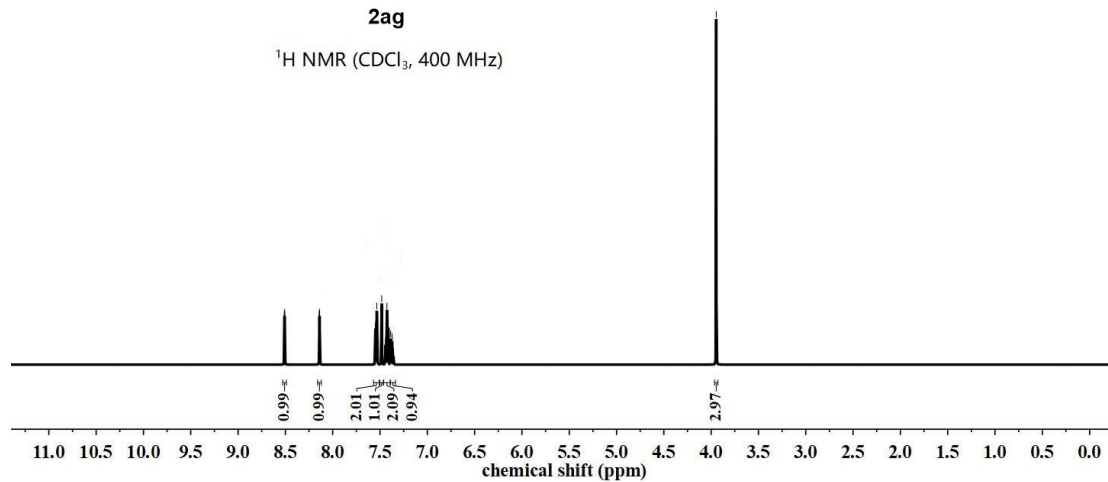

155.468  
143.631  
135.501  
135.330  
134.212  
129.025  
127.885  
127.846  
113.288  
77.318  
77.001  
76.081  
55.838

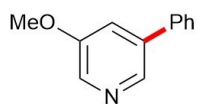

**2ag**

<sup>13</sup>C NMR (CDCl<sub>3</sub>, 101 MHz)

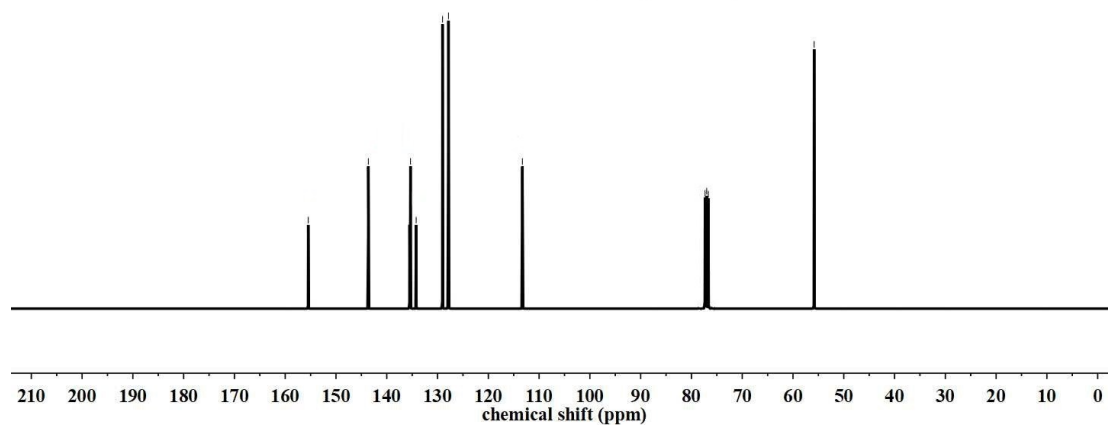

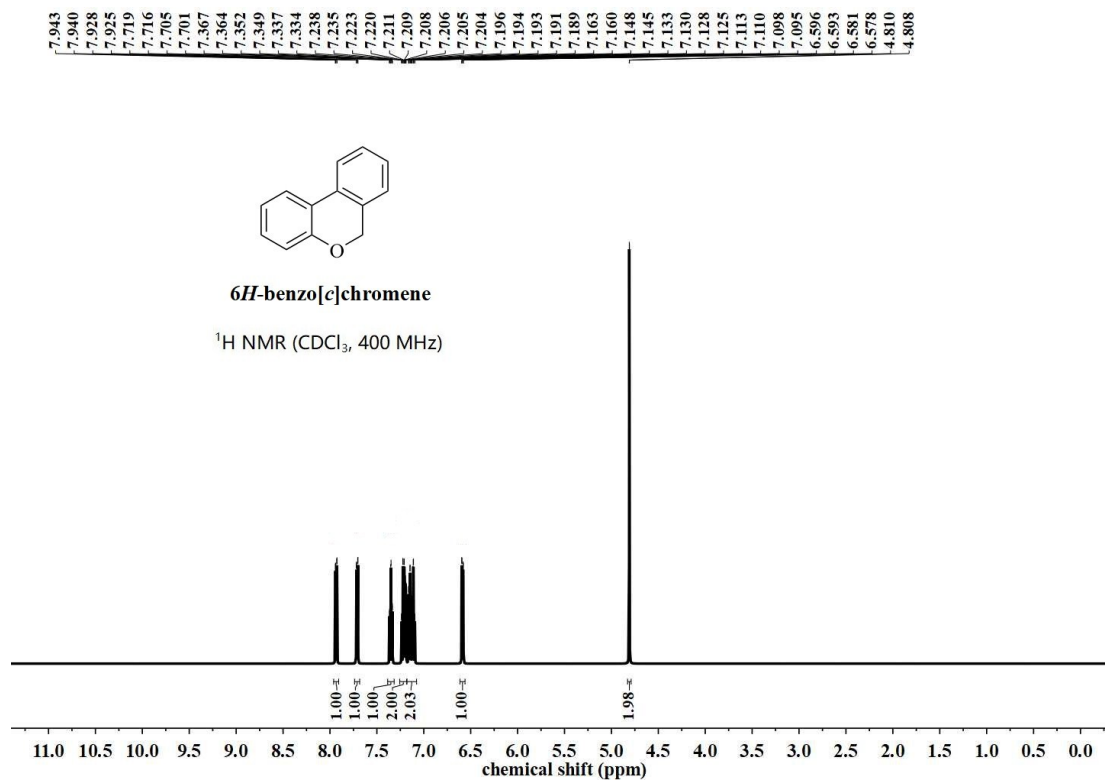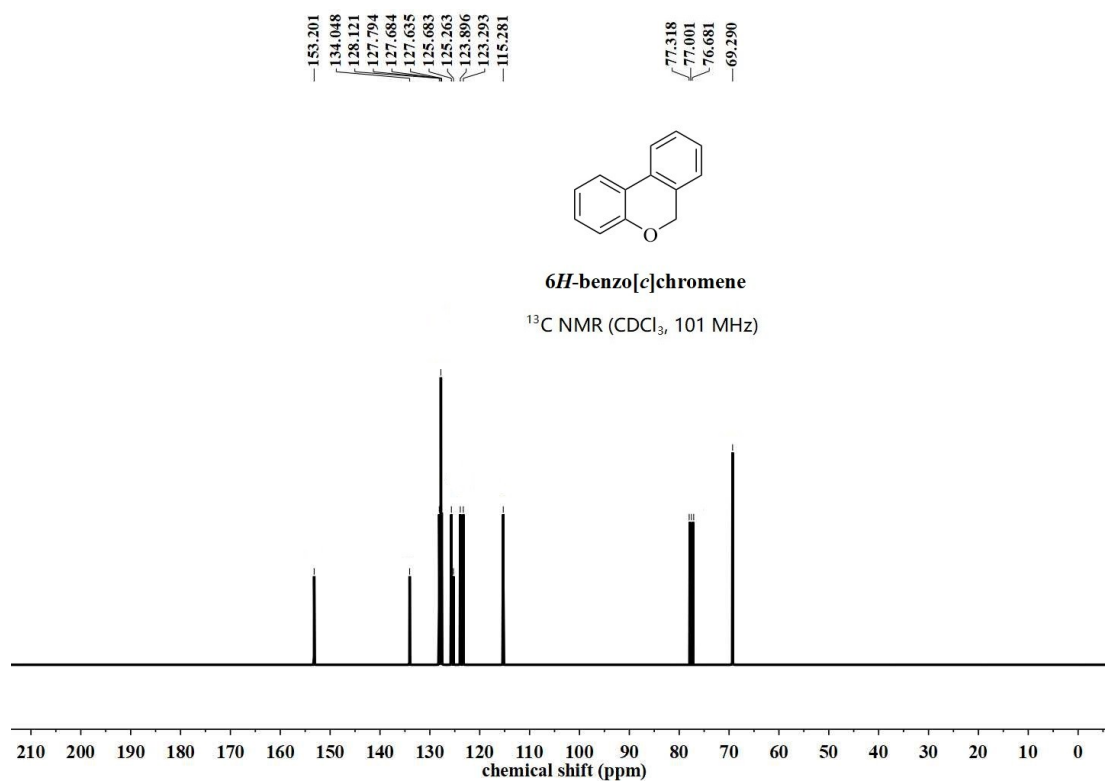

Supplement: d0ra01845g1.pdf [file d0ra01845g1.pdf]
